# Supplementary material for: Hunter-Gatherer Inter-Band Interaction Rates: Implications for Cumulative Culture
Source: PLoS One. 2014 Jul 21;9(7):e102806. doi: 10.1371/journal.pone.0102806 (PMC4105570; doi:10.1371/journal.pone.0102806)
Supplement: Database S1 — Database for Analyses. (XLS) [file pone.0102806.s002.xls]

## Sheet: Ache_Hazda_Analisys_Dataset.csv
id	ethn	rcoeff	closekin	affine	ritual	samecamp	sex	time	q6	q8	q10	q22	q34	q39	q19	q18	q23	q24	q9	q17	q31_1
1	Hazda	0	0	0	0	0	mm	7	1	0	1	1	0	0	1	1	1	1	1	1	1
2	Hazda	0.28125	1	0	1	0	mm	7	1	1	0	1	0	0	1	1	1	1	1	1	1
3	Hazda	0	0	1	0	0	mm	7	1	1	1	1	0	0	1	1	1	1	1	1	1
4	Hazda	0	0	1	1	0	mm	7	1	1	1	1	0	0	1	1	1	1	1	1	1
5	Hazda	0	0	0	0	0	mm	7	0	0	0	0	0	0	0	0	0	0	0	0	0
6	Hazda	0	0	0	0	0	mm	7	0	0	0	0	0	0	0	0	0	0	0	0	0
7	Hazda	0	0	0	0	0	mm	7	0	0	0	0	0	0	0	0	0	0	0	0	0
8	Hazda	0	0	0	1	0	mm	7	1	1	1	1	0	1	1	1	1	1	1	1	1
9	Hazda	0	0	0	0	0	mm	7	0	0	0	0	0	0	0	0	0	0	0	0	0
10	Hazda	0	0	0	1	0	mm	7	1	1	0	1	0	0	1	1	1	1	1	1	1
11	Hazda	0	0	0	0	0	mm	7	0	0	0	0	0	0	0	0	0	0	0	0	0
12	Hazda	0	0	0	0	0	mm	7	0	0	0	0	0	0	0	0	0	0	0	0	0
13	Hazda	0	0	0	1	0	mm	7	1	0	1	0	0	0	0	0	1	0	1	1	1
14	Hazda	0	0	1	1	0	mm	7	1	1	1	1	0	1	0	0	1	1	1	1	1
15	Hazda	0.015625	0	0	1	0	mm	7	1	1	1	0	0	1	1	0	1	1	1	1	1
16	Hazda	0	0	0	1	0	mm	7	1	0	1	0	0	0	0	0	0	0	1	1	1
17	Hazda	0	0	0	0	0	mm	7	0	0	0	0	0	0	0	0	0	0	0	0	0
18	Hazda	0	0	0	0	0	mm	7	0	0	0	0	0	0	0	0	0	0	0	0	0
19	Hazda	0	0	0	1	0	mm	7	1	1	1	1	0	1	1	1	1	1	1	1	1
20	Hazda	0	0	0	0	0	mm	7	0	0	0	0	0	0	0	0	0	0	0	0	0
21	Hazda	0	0	1	0	0	mm	7	1	1	0	1	1	0	0	1	1	0	1	1	1
22	Hazda	0.0039063	0	0	0	0	mm	7	1	0	0	0	0	0	0	0	0	0	1	1	0
23	Hazda	0.0039063	0	0	0	0	mm	7	0	0	0	0	0	0	0	0	0	0	0	0	0
24	Hazda	0	0	0	1	1	mm	7	1	1	0	1	1	1	1	1	1	1	1	1	1
25	Hazda	0	0	0	0	0	mm	7	0	0	0	0	0	0	0	0	0	0	0	0	0
26	Hazda	0	0	0	0	0	mm	7	1	0	0	0	0	0	1	1	0	0	1	1	1
27	Hazda	0	0	0	0	0	mm	7	0	0	0	0	0	0	0	0	0	0	0	0	0
28	Hazda	0.0625	0	0	0	0	mm	7	0	0	0	0	0	0	0	0	0	0	0	0	0
29	Hazda	0.078125	0	0	0	0	mm	7	0	0	0	0	0	0	0	0	0	0	0	0	0
30	Hazda	0	0	0	1	0	mm	7	1	0	0	1	0	1	0	1	0	0	1	1	1
31	Hazda	0	0	0	0	0	mm	7	0	0	0	0	0	0	0	0	0	0	0	0	0
32	Hazda	0	0	0	0	0	mm	7	1	0	0	0	0	0	0	1	1	0	1	1	0
33	Hazda	0	0	1	0	0	mm	7	0	0	0	0	0	0	0	0	0	0	0	0	0
34	Hazda	0.03125	0	0	1	0	mm	7	1	1	0	1	0	0	1	1	1	1	1	1	1
35	Hazda	0	0	1	1	0	mm	7	1	1	0	1	0	0	0	1	1	0	1	1	1
36	Hazda	0	0	0	0	0	mm	7	0	0	0	0	0	0	0	0	0	0	0	0	0
37	Hazda	0	0	0	0	0	mm	7	0	0	0	0	0	0	0	0	0	0	0	0	0
38	Hazda	0	0	0	0	0	mm	7	0	0	0	0	0	0	0	0	0	0	0	0	0
39	Hazda	0	0	0	0	0	mm	7	1	0	0	0	0	0	1	0	1	0	1	1	1
40	Hazda	0	0	0	0	0	mm	7	1	0	1	0	0	0	0	1	0	0	1	1	1
41	Hazda	0	0	1	0	0	mm	7	1	0	1	0	0	0	0	1	0	0	1	1	1
42	Hazda	0	0	0	0	0	mm	7	0	0	0	0	0	0	0	0	0	0	0	0	0
43	Hazda	0	0	0	0	0	mm	7	0	0	0	0	0	0	0	0	0	0	0	0	0
44	Hazda	0	0	0	0	0	mm	7	1	0	1	0	0	0	0	1	0	0	0	1	1
45	Hazda	0	0	0	0	0	mm	7	0	0	0	0	0	0	0	0	0	0	0	0	0
46	Hazda	0	0	1	0	0	mm	7	1	1	1	1	0	0	1	1	0	0	1	1	1
47	Hazda	0	0	0	0	0	mm	7	1	0	1	1	0	0	1	1	0	0	1	1	1
48	Hazda	0	0	1	0	0	mm	7	1		1	1	0	0	1	1	0	1	1	1	1
49	Hazda	0	0	1	0	0	mm	7	1	1	0	0	1	1	1	1	0	1	1	1	1
50	Hazda	0	0	0	0	0	mm	7	1	1	0	0	0	0	0	1	0	1	1	1	1
51	Hazda	0	0	0	0	0	mm	7	1	1	0	0	1	0	1	1	0	0	1	1	1
52	Hazda	0.0078125	0	1	1	0	mm	7	1	0	0	0	0	0	1	1	0	0	1	1	1
53	Hazda	0	0	0	0	0	mm	7	0	0	0	0	0	0	0	0	0	0	0	0	0
54	Hazda	0.0078125	0	0	0	0	mm	7	0	0	0	0	0	0	0	0	0	0	0	0	0
55	Hazda	0.0078125	0	0	0	0	mm	7	0	0	0	0	0	0	0	0	0	0	0	0	0
56	Hazda	0.0234375	0	0	0	0	mm	7	0	0	0	0	0	0	0	0	0	0	0	0	0
57	Hazda	0	0	0	0	0	mm	7	0	0	0	0	0	0	0	0	0	0	0	0	0
58	Hazda	0	0	0	0	0	mm	7	0	0	0	0	0	0	0	0	0	0	0	0	0
59	Hazda	0	0	0	0	0	mm	7	0	0	0	0	0	0	0	0	0	0	0	0	0
60	Hazda	0	0	1	0	0	mm	7	0	0	0	0	0	0	0	0	0	0	0	0	0
61	Hazda	0.0195313	0	0	0	0	mm	7	1	1	0	0	0	0	0	1	0	0	0	1	1
62	Hazda	0	0	0	1	0	mm	7	1	1	0	1	0	1	1	1	1	1	0	1	1
63	Hazda	0	0	0	1	0	mm	7	1	1	1	1	0	1	1	1	1	0	1	1	1
64	Hazda	0.0703125	0	0	0	0	mm	7	1	1	0	0	0	1	0	1	0	0	1	1	1
65	Hazda	0	0	0	0	0	mm	7	0	0	0	0	0	0	0	0	0	0	0	0	0
66	Hazda	0.0625	0	0	0	0	mm	7	0	0	0	0	0	0	0	0	0	0	0	0	0
67	Hazda	0.015625	0	0	0	0	mm	7	0	0	0	0	0	0	0	0	0	0	0	0	0
68	Hazda	0	0	0	0	0	mm	7	0	0	0	0	0	0	0	0	0	0	0	0	0
69	Hazda	0.0234375	0	0	0	0	mm	7	0	0	0	0	0	0	0	0	0	0	0	0	0
70	Hazda	0	0	0	0	0	mm	7	0	0	0	0	0	0	0	0	0	0	0	0	0
71	Hazda	0.015625	0	1	0	0	mm	7	1	0	0	1	0	0	1	1	0	0	1	1	1
72	Hazda	0	0	0	0	0	mm	7	0	0	0	0	0	0	0	0	0	0	0	0	0
73	Hazda	0	0	0	1	0	mm	7	1	1	0	1	1	1	1	1	1	1	1	1	1
74	Hazda	0	0	0	0	0	mm	7	1	0	0	0	0	0	0	1	0	0	1	1	1
75	Hazda	0	0	0	0	0	mm	7	1	0	0	0	0	0	0	1	1	1	0	1	1
76	Hazda	0	0	1	0	0	mm	7	1	1	0	0	0	1	1	1	0	0	1	1	1
77	Hazda	0	0	0	0	0	mm	7	0	0	0	0	0	0	0	0	0	0	0	0	0
78	Hazda	0	0	0	0	0	mm	7	0	0	0	0	0	0	0	0	0	0	0	0	0
79	Hazda	0	0	1	0	0	mm	7	1	1	0	1	0	0	1	1	1	0	1	1	1
80	Hazda	0	0	0	0	0	mm	7	0	0	0	0	0	0	0	0	0	0	0	0	0
81	Hazda	0	0	0	0	0	mm	7	1	1	0	1	1	0	1	1	1	0	1	1	1
82	Hazda	0	0	0	0	0	mm	7	0	0	0	0	0	0	0	0	0	0	0	0	0
83	Hazda	0	0	0	0	0	mm	7	0	0	0	0	0	0	0	0	0	0	0	0	0
84	Hazda	0	0	0	0	0	mm	7	0	0	0	0	0	0	0	0	0	0	0	0	0
85	Hazda	0	0	0	1	0	mm	7	1	1	0	1	0	1	1	1	1	1	1	1	1
86	Hazda	0	0	0	0	0	mm	7	1	0	0	0	0	0	0	0	0	0	0	0	0
87	Hazda	0.03125	0	0	1	0	mm	7	1	1	1	1	1	1	1	1	1	1	1	1	1
88	Hazda	0	0	1	0	0	mm	7	1	0	1	0	0	1	1	1	1	1	0	1	1
89	Hazda	0.03125	0	0	0	0	mm	7	0	0	0	0	0	0	0	0	0	0	0	0	0
90	Hazda	0	0	0	1	0	mm	7	1	1	0	1	1	1	1	1	1	1	1	1	1
91	Hazda	0	0	0	0	0	mm	7	0	0	0	0	0	0	0	0	0	0	0	0	0
92	Hazda	0	0	0	0	0	mm	7	0	0	0	0	0	0	0	0	0	0	0	0	0
93	Hazda	0	0	0	0	0	mm	7	1	0	1	0	0	0	0	0	0	0	1	1	1
94	Hazda	0	0	1	0	0	mm	7	1	0	1	0	0	0	0	0	0	0	1	1	1
95	Hazda	0	0	0	1	0	mm	7	1	0	1	0	0	0	0	0	0	0	1	1	1
96	Hazda	0	0	1	1	0	mm	7	1	0	1	1	0	0	1	1	1	1	1	1	1
97	Hazda	0	0	0	0	0	mm	7	0	0	0	0	0	0	0	0	0	0	0	0	0
98	Hazda	0	0	0	0	0	mm	7	0	0	0	0	0	0	0	0	0	0	0	0	0
99	Hazda	0.03125	0	0	0	0	mm	7	1	0	1	0	0	0	0	1	1	0	0	1	0
100	Hazda	0	0	0	0	0	mm	7	0	0	0	0	0	0	0	0	0	0	0	0	0
101	Hazda	0.0429688	0	0	0	0	mm	7	0	0	0	0	0	0	0	0	0	0	0	0	0
102	Hazda	0	0	0	0	0	mm	7	1	0	0	0	0	0	0	0	0	0	0	0	0
103	Hazda	0.0195313	0	1	0	0	mm	7	1	1	1	1	0	0	0	1	1	1	0	1	1
104	Hazda	0	0	0	0	0	mm	7	0	0	0	0	0	0	0	0	0	0	0	0	0
105	Hazda	0.0097656	0	1	0	0	mm	7	1	1	1	0	0	0	0	0	0	0	0	1	1
106	Hazda	0	0	0	0	0	mm	7	1	0	0	0	0	0	0	0	0	0	1	1	1
107	Hazda	0	0	0	0	0	mm	7	1	0	1	0	0	0	0	0	0	0	0	1	1
108	Hazda	0.0195313	0	1	0	0	mm	7	1	1	0	0	0	0	1	0	0	0	1	1	1
109	Hazda	0	0	1	0	0	mm	7	0	0	0	0	0	0	0	0	0	0	0	0	0
110	Hazda	0	0	0	0	0	mm	7	1	0	1	1	0	0	1	1	1	0	1	1	1
111	Hazda	0.03125	0	1	0	0	mm	7	1	0	1	1	1	0	1	1	1	1	1	1	1
112	Hazda	0	0	0	0	0	mm	7	0	0	0	0	0	0	0	0	0	0	0	0	0
113	Hazda	0	0	1	0	0	mm	7	1	1	1	0	0	0	1	1	1	0	1	1	1
114	Hazda	0	0	1	0	1	mm	7	1	1	1	1	1	1	1	1	1	1	1	1	1
115	Hazda	0	0	0	0	0	mm	7	1	1	0	1	0	0	0	0	0	0	0	1	1
116	Hazda	0.015625	0	1	0	0	mm	7	1	1	0	1	0	0	0	0	0	0	0	1	1
117	Hazda	0	0	1	0	0	mm	7	1	0	1	0	0	0	0	1	0	0	1	1	1
118	Hazda	0	0	1	0	0	mm	7	1	0	0	0	0	0	0	0	0	0	1	0	1
119	Hazda	0.28125	1	0	0	0	mm	7	1	0	1	1	0	0	1	1	0	0	1	1	1
120	Hazda	0	0	0	0	0	mm	7	0	0	0	0	0	0	0	0	0	0	0	0	0
121	Hazda	0	0	0	0	0	mm	7	0	0	0	0	0	0	0	0	0	0	0	0	0
122	Hazda	0.125	1	0	0	0	mm	7	0	0	0	0	0	0	0	0	0	0	0	0	0
123	Hazda	0	0	0	0	0	mm	7	0	0	0	0	0	0	0	0	0	0	0	0	0
124	Hazda	0	0	0	0	0	mm	7	0	0	0	0	0	0	0	0	0	0	0	0	0
125	Hazda	0	0	1	0	0	mm	7	0	0	0	0	0	0	0	0	0	0	0	0	0
126	Hazda	0	0	0	0	0	mm	7	0	0	0	0	0	0	0	0	0	0	0	0	0
127	Hazda	0	0	0	0	0	mm	7	0	0	0	0	0	0	0	0	0	0	0	0	0
128	Hazda	0	0	0	0	0	mm	7	0	0	0	0	0	0	0	0	0	0	0	0	0
129	Hazda	0	0	0	1	0	mm	7	1	1	1	1	1	1	1	1	1	1	1	1	1
130	Hazda	0	0	0	1	0	mm	7	1	1	1	1	0	1	1	1	1	1	1	1	1
131	Hazda	0.5	1	0	1	0	mm	7	1	1	0	1	1	1	1	1	1	1	1	1	1
132	Hazda	0	0	1	1	0	mm	7	1	1	0	1	0	1	1	1	1	1	1	1	1
133	Hazda	0	0	0	0	0	mm	7	0	0	0	0	0	0	0	0	0	0	1	0	0
134	Hazda	0	0	0	0	0	mm	7	0	0	0	0	0	0	0	0	0	0	0	0	0
135	Hazda	0	0	1	1	1	mm	7	1	1	0	1	0	1	1	1	1	1	1	1	1
136	Hazda	0	0	1	1	1	mm	7	1	1	0	1	0	0	1	1	1	1	1	1	1
137	Hazda	0	0	0	0	0	mm	7	0	0	0	0	0	0	0	0	0	0	0	0	0
138	Hazda	0	0	1	0	0	mm	7	0	0	0	0	0	0	0	0	0	0	0	0	0
139	Hazda	0	0	1	0	0	mm	7	0	0	0	0	0	0	0	0	0	0	0	0	0
140	Hazda	0	0	0	0	0	mm	7	0	0	0	0	0	0	0	0	0	0	0	0	0
141	Hazda	0	0	0	0	0	mm	7	0	0	0	0	0	0	0	0	0	0	0	0	0
142	Hazda	0	0	1	0	0	mm	7	0	0	0	0	0	0	0	0	0	0	0	0	0
143	Hazda	0	0	1	0	0	mm	7	0	0	0	0	0	0	0	0	0	0	0	0	0
144	Hazda	0	0	1	1	0	mm	7	1	0	1	1	1	1	1	1	0	1	1	1	1
145	Hazda	0	0	0	0	0	mm	7	1	0	0	0	0	0	0	0	0	0	0	0	0
146	Hazda	0	0	1	0	0	mm	7	0	0	0	0	0	0	0	0	0	0	0	0	0
147	Hazda	0	0	1	1	0	mm	7	1	0	1	0	0	0	1	1	1	1	0	0	1
148	Hazda	0.28125	1	0	1	0	mm	7	1	1	0	1	1	1	1	1	1	1	1	1	1
149	Hazda	0	0	0	0	0	mm	7	0	0	0	0	0	0	0	0	0	0	0	0	0
150	Hazda	0	0	0	0	0	mm	7	0	0	0	0	0	0	0	0	0	0	0	0	0
151	Hazda	0	0	0	0	0	mm	7	0	0	0	0	0	0	0	0	0	0	0	0	0
152	Hazda	0	0	0	0	0	mm	7	0	0	0	0	0	0	0	0	0	0	0	0	0
153	Hazda	0	0	0	0	0	mm	7	0	0	0	0	0	0	0	0	0	0	0	0	0
154	Hazda	0	0	0	0	0	mm	7	0	0	0	0	0	0	0	0	0	0	0	0	0
155	Hazda	0	0	0	0	0	mm	7	0	0	0	0	0	0	0	0	0	0	0	0	0
156	Hazda	0	0	0	0	0	mm	7	0	0	0	0	0	0	0	0	0	0	0	0	0
157	Hazda	0	0	0	0	0	mm	7	0	0	0	0	0	0	0	0	0	0	0	0	0
158	Hazda	0	0	0	0	0	mm	7	0	0	0	0	0	0	0	0	0	0	0	0	0
159	Hazda	0	0	1	0	0	mm	7	1	0	1	0	0	0	1	0	0	1	0	1	1
160	Hazda	0	0	1	1	0	mm	7	1	1	0	0	0	0	1	1	1	1	1	1	1
161	Hazda	0.125	1	0	0	0	mm	7	0	0	0	0	0	0	0	0	0	0	0	0	0
162	Hazda	0.125	1	1	0	0	mm	7	1	1	0	1	0	1	1	0	1	1	0	1	1
163	Hazda	0	0	0	0	0	mm	7	0	0	0	0	0	0	0	0	0	0	0	0	0
164	Hazda	0.25	1	0	0	0	mm	7	0	0	0	0	0	0	0	0	0	0	0	0	0
165	Hazda	0	0	0	0	0	mm	7	0	0	0	0	0	0	0	0	0	0	0	0	0
166	Hazda	0	0	0	0	0	mm	7	0	0	0	0	0	0	0	0	0	0	0	0	0
167	Hazda	0	0	0	0	0	mm	7	0	0	0	0	0	0	0	0	0	0	0	0	0
168	Hazda	0	0	0	0	0	mm	7	0	0	0	0	0	0	0	0	0	0	0	0	0
169	Hazda	0	0	1	0	0	mm	7	0	0	0	0	0	0	0	0	0	0	0	0	0
170	Hazda	0	0	0	0	0	mm	7	0	0	0	0	0	0	0	0	0	0	0	0	0
171	Hazda	0	0	0	0	0	mm	7	0	0	0	0	0	0	0	0	0	0	0	0	0
172	Hazda	0	0	0	0	0	mm	7	0	1	1	1	0	0	0	0	1	0	0	0	1
173	Hazda	0.125	1	0	0	0	mm	7	1	0	1	0	0	0	0	1	0	0	0	1	1
174	Hazda	0.125	1	0	0	0	mm	7	1	0	0	1	0	0	0	1	1	0	0	1	1
175	Hazda	0	0	0	0	0	mm	7	1	1	0	0	0	0	0	0	0	0	0	1	1
176	Hazda	0	0	1	0	0	mm	7	1	1	0	1	0	0	1	1	1	1	0	1	1
177	Hazda	0	0	0	0	0	mm	7	0	0	0	0	0	0	0	0	0	0	0	0	0
178	Hazda	0	0	0	0	0	mm	7	0	0	0	0	0	0	0	0	0	0	0	0	0
179	Hazda	0	0	0	0	0	mm	7	0	0	0	0	0	0	0	0	0	0	0	0	0
180	Hazda	0	0	1	0	0	mm	7	1	1	0	0	0	0	0	0	0	0	0	1	0
181	Hazda	0.03125	0	0	1	1	mm	7	1	0	0	1	0	0	1	1	1	1	0	1	1
182	Hazda	0.0742188	0	0	0	0	mm	7	0	0	0	0	0	0	0	0	0	0	0	0	0
183	Hazda	0	0	1	0	0	mm	7	0	0	0	0	0	0	0	0	0	0	0	0	0
184	Hazda	0	0	0	0	0	mm	7	0	0	0	0	0	0	0	0	0	0	0	0	0
185	Hazda	0	0	0	0	0	mm	7	1	1	0	0	0	0	0	0	0	0	0	0	1
186	Hazda	0	0	0	0	0	mm	7	0	0	0	0	0	0	0	0	0	0	0	0	0
187	Hazda	0.125	1	0	1	0	mm	7	1	0	1	1	1	0	1	1	1	1	1	1	1
188	Hazda	0	0	0	0	0	mm	7	1	1	0	1	1	0	1	1	1	1	1	1	1
189	Hazda	0	0	0	0	0	mm	7	0	0	0	0	0	0	0	0	0	0	0	0	0
190	Hazda	0	0	0	0	0	mm	7	0	0	0	0	0	0	0	0	0	0	0	0	0
191	Hazda	0.03125	0	0	0	0	mm	7	0	0	0	0	0	0	0	0	0	0	0	0	0
192	Hazda	0.03125	0	0	0	0	mm	7	0	0	0	0	0	0	0	0	0	0	0	0	0
193	Hazda	0	0	0	0	0	mm	7	1	1	0	1	0	0	1	1	1	1	1	1	1
194	Hazda	0.0625	0	0	0	0	mm	7	0	0	0	0	0	0	0	0	0	0	0	0	0
195	Hazda	0	0	0	0	0	mm	7	0	0	0	0	0	0	0	0	0	0	0	0	0
196	Hazda	0	0	0	0	0	mm	7	1	0	0	1	0	0	1	0	1	1	1	1	1
197	Hazda	0	0	0	0	0	mm	7	1	0	0	1	0	0	1	1	1	0	1	1	1
198	Hazda	0	0	0	0	0	mm	7	0	0	0	0	0	0	0	0	0	0	0	0	0
199	Hazda	0.03125	0	1	0	0	mm	7	1	0	1	0	0	0	0	0	0	0	0	1	1
200	Hazda	0.03125	0	1	1	0	mm	7	1	1	1	1	0	1	1	1	1	1	1	1	1
201	Hazda	0.015625	0	0	0	0	mm	7	0	0	0	0	0	0	0	0	0	0	0	0	0
202	Hazda	0.03125	0	0	0	0	mm	7	0	0	0	0	0	0	0	0	0	0	0	0	0
203	Hazda	0	0	0	0	0	mm	7	0	0	0	0	0	0	0	0	0	0	0	0	0
204	Hazda	0.015625	0	0	0	0	mm	7	0	0	0	0	0	0	0	0	0	0	0	0	0
205	Hazda	0	0	1	0	0	mm	7	1	0	0	1	0	0	1	1	0	1	1	1	1
206	Hazda	0	0	1	1	0	mm	7	1	0	1	0	1	0	1	1	0	1	1	1	1
207	Hazda	0	0	0	1	0	mm	7	1	0	0	0	0	0	1	0	0	1	0	1	1
208	Hazda	0	0	0	0	0	mm	7	1	0	0	0	0	0	1	0	1	0	0	1	1
209	Hazda	0	0	1	0	0	mm	7	1	0	0	0	0	0	1	0	1	0	1	1	1
210	Hazda	0	0	0	0	0	mm	7	0	0	0	0	0	0	0	0	0	0	0	0	0
211	Hazda	0	0	0	0	0	mm	7	1	0	0	1	0	0	1	1	1	0	1	1	1
212	Hazda	0	0	0	0	0	mm	7	0	0	0	0	0	0	0	0	0	0	0	0	0
213	Hazda	0	0	0	0	0	mm	7	0	0	0	0	0	0	0	0	0	0	0	0	0
214	Hazda	0	0	0	0	0	mm	7	0	0	0	0	0	0	0	0	0	0	0	0	0
215	Hazda	0	0	0	0	0	mm	7	0	0	0	0	0	0	0	0	0	0	0	0	0
216	Hazda	0	0	0	0	0	mm	7	0	0	0	0	0	0	0	0	0	0	0	0	0
217	Hazda	0	0	1	1	0	mm	7	1	1	1	0	0	0	0	0	0	0	0	0	1
218	Hazda	0	0	0	0	0	mm	7	0	0	0	0	0	0	0	0	0	0	0	0	0
219	Hazda	0	0	0	0	0	mm	7	0	1	0	0	1	1	0	0	0	0	0	0	1
220	Hazda	0	0	0	0	0	mm	7	0	0	0	0	0	0	0	0	0	0	0	0	0
221	Hazda	0	0	0	1	1	mm	7	1	1	1	1	0	1	1	1	1	1	1	1	1
222	Hazda	0	0	0	1	1	mm	7	1	1	1	1	1	1	1	1	1	1	1	1	1
223	Hazda	0	0	0	0	0	mm	7	0	0	0	0	0	0	0	0	0	0	0	0	0
224	Hazda	0	0	0	0	0	mm	7	1	1	1	1	0	0	1	1	1	0	1	1	1
225	Hazda	0	0	0	0	0	mm	7	0	0	0	0	0	0	0	0	0	0	0	0	0
226	Hazda	0	0	0	0	0	mm	7	0	0	0	0	0	0	0	0	0	0	0	0	0
227	Hazda	0	0	0	0	0	mm	7	0	0	0	0	0	0	0	0	0	0	0	0	0
228	Hazda	0	0	0	0	0	mm	7	0	1	0	0	0	0	0	0	0	0	0	0	0
229	Hazda	0	0	1	1	0	mm	7	1	1	0	1	1	1	1	1	1	1	1	1	1
230	Hazda	0	0	1	1	1	mm	7	1	1	1	1	1	1	1	1	1	1	1	1	1
231	Hazda	0	0	0	1	0	mm	7	1	1	1	1	1	1	1	1	1	1	1	1	1
232	Hazda	0	0	0	1	0	mm	7	1	1	1	1	0	0	1	1	0	0	1	1	1
233	Hazda	0	0	0	0	0	mm	7	1	0	0	1	1	0	0	0	1	0	0	1	1
234	Hazda	0	0	0	1	0	mm	7	1	0	0	1	1	1	1	0	0	1	1	1	1
235	Hazda	0	0	0	0	0	mm	7	0	0	0	0	0	0	0	0	0	0	0	0	0
236	Hazda	0	0	0	0	0	mm	7	0	0	0	0	0	0	0	0	0	0	0	0	0
237	Hazda	0	0	0	0	0	mm	7	0	0	0	0	0	0	0	0	0	0	0	0	0
238	Hazda	0	0	0	0	0	mm	7	0	0	0	0	0	0	0	0	0	0	0	0	0
239	Hazda	0	0	0	0	0	mm	7	0	0	0	0	0	0	0	0	0	0	0	0	0
240	Hazda	0	0	0	0	0	mm	7	0	0	0	0	0	0	0	0	0	0	0	0	0
241	Hazda	0	0	0	0	0	mm	7	0	0	0	0	0	0	0	0	0	0	0	0	0
242	Hazda	0	0	1	0	0	mm	7	0	0	0	0	0	0	0	0	0	0	0	0	0
243	Hazda	0	0	0	0	0	mm	7	0	0	0	0	0	0	0	0	0	0	0	0	0
244	Hazda	0	0	0	0	0	mm	7	0	0	0	0	0	0	0	0	0	0	0	0	0
245	Hazda	0	0	0	0	0	mm	7	0	0	0	0	0	0	0	0	0	0	0	0	0
246	Hazda	0	0	0	0	0	mm	7	0	0	0	0	0	0	0	0	0	0	0	0	0
247	Hazda	0	0	0	0	0	mm	7	0	0	0	0	0	0	0	0	0	0	0	0	0
248	Hazda	0	0	1	0	0	mm	7	0	0	0	0	0	0	0	0	0	0	0	0	0
249	Hazda	0	0	0	1	0	mm	7	0	0	0	1	1	1	1	1	1	1	1	1	1
250	Hazda	0	0	0	0	0	mm	7	0	0	0	0	0	0	0	0	0	0	1	1	0
251	Hazda	0	0	1	0	0	mm	7	1	1	0	0	0	0	0	0	1	0	1	1	1
252	Hazda	0	0	0	1	1	mm	7	1	1	0	1	1	1	1	1	1	0	1	1	1
253	Hazda	0	0	0	0	0	mm	7	1	1	0	0	0	0	0	0	0	0	0	0	0
254	Hazda	0	0	0	0	0	mm	7	0	0	0	0	0	0	0	0	0	0	0	0	0
255	Hazda	0.015625	0	0	0	1	mm	7	0	1	0	0	0	0	0	0	0	0	0	0	0
256	Hazda	0	0	0	0	0	mm	7	0	0	0	0	0	0	0	0	0	0	0	0	0
257	Hazda	0	0	0	0	0	mm	7	1	0	0	0	0	0	0	0	0	0	1	0	0
258	Hazda	0	0	1	0	0	mm	7	1	1	1	0	0	0	0	0	0	0	0	1	0
259	Hazda	0	0	0	0	0	mm	7	0	0	0	0	0	0	0	0	0	0	0	0	0
260	Hazda	0	0	1	0	0	mm	7	0	0	0	0	0	0	0	0	0	0	0	0	0
261	Hazda	0	0	0	0	0	mm	7	0	0	0	0	0	0	0	0	0	0	0	0	0
262	Hazda	0.03125	0	0	0	0	mm	7	0	0	0	0	0	0	0	0	0	0	0	0	0
263	Hazda	0	0	0	0	0	mm	7	0	0	0	0	0	0	0	0	0	0	0	0	0
264	Hazda	0	0	0	0	0	mm	7	0	0	0	0	0	0	0	0	0	0	0	0	0
265	Hazda	0.25	1	0	0	0	mm	7	1	1	0	0	0	0	1	0	0	1	1	1	1
266	Hazda	0.125	1	0	0	0	mm	7	1	1	0	0	1	0	1	0	0	0	1	1	1
267	Hazda	0	0	0	0	0	mm	7	1	1	0	0	0	0	0	0	0	0	1	1	1
268	Hazda	0	0	0	0	0	mm	7	0	0	0	0	0	0	0	0	0	0	0	0	0
269	Hazda	0	0	0	0	0	mm	7	0	0	0	0	0	0	0	0	0	0	0	0	0
270	Hazda	0	0	0	0	0	mm	7	1	0	0	0	0	0	1	0	0	0	0	1	1
271	Hazda	0	0	0	0	0	mm	7	0	0	0	0	0	0	0	0	0	0	0	0	0
272	Hazda	0	0	0	0	0	mm	7	0	0	0	0	0	0	0	0	0	0	0	0	0
273	Hazda	0.03125	0	0	0	0	mm	7	1	0	0	0	0	0	1	0	0	0	1	1	1
274	Hazda	0.0625	0	0	0	0	mm	7	0	0	0	0	0	0	0	0	0	0	0	0	0
275	Hazda	0	0	0	0	0	mm	7	1	0	0	0	0	0	1	0	0	0	1	1	1
276	Hazda	0	0	0	0	0	mm	7	0	0	0	0	0	0	0	0	0	0	0	0	0
277	Hazda	0	0	0	0	0	mm	7	0	0	0	0	0	0	0	0	0	0	0	0	0
278	Hazda	0	0	0	0	0	mm	7	1	1	0	0	0	0	0	0	0	0	0	1	1
279	Hazda	0.015625	0	0	0	0	mm	7	1	1	1	0	1	0	1	1	1	1	0	1	1
280	Hazda	0	0	1	0	1	mm	7	1	1	1	0	0	0	1	0	1	0	1	1	0
281	Hazda	0.0703125	0	0	0	0	mm	7	0	0	0	0	0	0	0	0	0	0	0	0	0
282	Hazda	0	0	0	0	0	mm	7	1	1	0	0	0	0	0	0	0	0	0	1	0
283	Hazda	0	0	0	0	0	mm	7	0	0	0	0	0	0	0	0	0	0	0	0	0
284	Hazda	0	0	0	0	0	mm	7	0	0	0	0	0	0	0	0	0	0	0	0	0
285	Hazda	0.0625	0	0	0	0	mm	7	0	0	0	0	0	0	0	0	0	0	0	0	0
286	Hazda	0	0	0	0	0	mm	7	0	0	0	0	0	0	0	0	0	0	0	0	0
287	Hazda	0	0	0	0	0	mm	7	0	0	0	0	0	0	0	0	0	0	0	0	0
288	Hazda	0	0	0	0	0	mm	7	0	0	0	0	0	0	0	0	0	0	0	0	0
289	Hazda	0	0	0	0	0	ff	7	1	0	0	0	0	0	0	0	1	0	0	1	0
290	Hazda	0	0	0	0	0	ff	7	0	0	0	0	0	0	0	0	0	0	0	0	0
291	Hazda	0	0	1	0	0	ff	7	1	0	1	0	0	0	0	0	1	0	1	1	1
292	Hazda	0	0	0	0	0	ff	7	1	0	0	0	0	1	1	1	0	0	0	1	1
293	Hazda	0	0	0	0	0	ff	7	1	0	0	0	0	0	0	0	0	0	1	1	1
294	Hazda	0	0	0	0	0	ff	7	1	1	0	0	0	0	0	1	1	1	1	1	1
295	Hazda	0	0	0	0	0	ff	7	0	0	0	0	0	0	0	0	0	0	0	0	0
296	Hazda	0	0	0	0	0	ff	7	0	0	0	0	0	0	0	0	0	0	0	0	0
297	Hazda	0	0	0	0	0	ff	7	1	1	0	0	0	1	0	1	1	1	1	1	1
298	Hazda	0	0	0	0	0	ff	7	0	0	0	0	0	0	0	0	0	0	0	1	0
299	Hazda	0	0	0	0	0	ff	7	1	0	0	0	0	1	0	1	1	1	1	1	1
300	Hazda	0	1	0	0	0	ff	7	1	0	0	0	0	1	0	1	0	1	1	1	1
301	Hazda	0.015625	0	0	0	0	ff	7	0	0	0	0	0	0	0	0	0	0	0	0	0
302	Hazda	0.0195313	0	0	0	0	ff	7	0	0	0	0	0	0	0	0	0	0	0	0	0
303	Hazda	0	0	0	0	0	ff	7	0	0	0	0	0	0	0	0	0	0	0	0	0
304	Hazda	0	0	0	0	0	ff	7	1	0	0	1	0	1	1	1	1	1	1	1	1
305	Hazda	0.015625	0	0	0	0	ff	7	0	0	0	0	0	0	0	0	0	0	0	0	0
306	Hazda	0	0	0	0	0	ff	7	0	0	0	0	0	0	0	0	0	0	0	0	0
307	Hazda	0.0039063	0	0	0	0	ff	7	0	0	0	0	0	0	0	0	0	0	0	0	0
308	Hazda	0	0	0	0	0	ff	7	1	1	0	1	0	0	1	1	1	1	1	1	1
309	Hazda	0.015625	0	1	0	0	ff	7	1	1	0	0	0	1	0	0	1	1	1	1	1
310	Hazda	0	0	0	0	0	ff	7	1	1	0	1	0	1	1	0	1	1	1	1	1
311	Hazda	0.0820313	0	0	0	0	ff	7	1	0	0	1	0	1	1	0	0	1	1	1	1
312	Hazda	0	1	0	0	0	ff	7	1	0	0	1	0	0	0	1	0	1	0	1	1
313	Hazda	0	0	0	0	0	ff	7	0	0	0	0	0	0	0	0	0	0	0	0	0
314	Hazda	0.0390625	0	0	0	0	ff	7	0	0	0	0	0	0	0	0	0	0	0	0	0
315	Hazda	0.0390625	0	0	0	0	ff	7	0	0	0	0	0	0	0	0	0	0	0	0	0
316	Hazda	0.015625	0	0	0	0	ff	7	0	0	0	0	0	0	0	0	0	0	0	0	0
317	Hazda	0.125	0	1	0	0	ff	7	0	0	0	0	0	0	0	0	0	0	0	0	0
318	Hazda	0	0	0	0	0	ff	7	0	0	0	0	0	0	0	0	0	0	0	0	0
319	Hazda	0	0	0	0	0	ff	7	0	0	0	0	0	0	0	0	0	0	0	0	0
320	Hazda	0.0078125	0	0	0	0	ff	7	1	0	0	1	0	1	1	0	1	1	1	1	1
321	Hazda	0	0	0	0	0	ff	7	1	1	0	1	0	1	1	0	1	1	1	1	1
322	Hazda	0	0	0	0	0	ff	7	1	0	0	0	0	0	0	0	0	0	0	1	0
323	Hazda	0	0	0	0	0	ff	7	1	0	0	1	0	0	0	0	0	1	1	1	1
324	Hazda	0.0625	0	0	0	0	ff	7	1	1	0	1	0	1	1	0	1	1	1	1	1
325	Hazda	0	0	0	0	0	ff	7	1	1	0	0	0	0	0	1	1	1	0	0	1
326	Hazda	0	0	0	0	0	ff	7	1	0	1	0	0	0	0	1	0	0	1	1	1
327	Hazda	0	0	0	0	1	ff	7	1	1	0	1	0	1	1	1	1	1	1	1	1
328	Hazda	0	1	0	0	0	ff	7	1	0	0	1	0	1	0	1	1	1	1	1	1
329	Hazda	0	0	0	0	0	ff	7	0	0	0	0	0	0	0	0	0	0	0	0	0
330	Hazda	0	0	0	0	0	ff	7	1	0	0	1	1	1	0	0	1	1	1	1	1
331	Hazda	0	0	0	0	0	ff	7	0	0	0	0	0	0	0	0	0	0	0	0	0
332	Hazda	0	0	0	0	0	ff	7	1	0	0	1	0	1	0	1	1	1	1	1	1
333	Hazda	0	0	0	0	0	ff	7	0	0	0	0	0	0	0	0	0	0	0	0	0
334	Hazda	0	0	0	0	0	ff	7	0	0	0	0	0	0	0	0	0	0	0	0	0
335	Hazda	0	0	0	0	0	ff	7	0	0	0	0	0	0	0	0	0	0	0	0	0
336	Hazda	0.125	0	0	0	0	ff	7	0	0	0	0	0	0	0	0	0	0	0	0	0
337	Hazda	0	0	0	0	0	ff	7	0	0	0	0	0	0	0	0	0	0	0	0	0
338	Hazda	0	1	0	0	0	ff	7	1	1	1	1	1	1	1	1	1	1	1	1	1
339	Hazda	0	0	0	0	0	ff	7	1	0	1	1	0	0	0	0	1	0	0	0	1
340	Hazda	0	0	0	0	0	ff	7	1	0	1	1	0	1	1	1	1	1	1	1	1
341	Hazda	0	0	0	0	0	ff	7	1	0	0	0	1	1	1	1	1	1	0	1	1
342	Hazda	0	0	0	0	0	ff	7	0	0	0	0	0	0	0	0	0	0	0	0	0
343	Hazda	0	0	0	0	0	ff	7	0	0	0	0	0	0	0	0	0	0	0	0	0
344	Hazda	0.015625	0	0	0	0	ff	7	0	0	0	0	0	0	0	0	0	0	0	0	0
345	Hazda	0	0	0	0	0	ff	7	0	0	0	0	0	0	0	0	0	0	0	0	0
346	Hazda	0	0	0	0	0	ff	7	0	0	0	0	0	0	0	0	0	0	0	0	0
347	Hazda	0	1	0	0	0	ff	7	0	0	0	0	0	0	0	0	0	0	0	0	0
348	Hazda	0.015625	0	0	0	0	ff	7	0	0	0	0	0	0	0	0	0	0	0	0	0
349	Hazda	0.0234375	0	0	0	0	ff	7	0	0	0	0	0	0	0	0	0	0	0	0	0
350	Hazda	0	0	0	0	0	ff	7	0	0	0	0	0	0	0	0	0	0	0	0	0
351	Hazda	0	0	0	0	0	ff	7	0	0	0	0	0	0	0	0	0	0	0	0	0
352	Hazda	0.0234375	0	0	0	0	ff	7	0	0	0	0	0	0	0	0	0	0	0	0	0
353	Hazda	0	0	0	0	0	ff	7	1	0	0	1	1	0	1	1	0	1	1	0	1
354	Hazda	0	0	0	0	0	ff	7	1	1	0	0	0	0	0	0	0	1	0	0	1
355	Hazda	0	0	0	0	0	ff	7	1	1	0	1	0	0	1	1	1	1	0	1	1
356	Hazda	0	0	0	0	0	ff	7	0	0	0	0	0	0	0	0	0	0	0	0	0
357	Hazda	0	0	0	0	0	ff	7	0	0	0	0	0	0	0	0	0	0	0	0	0
358	Hazda	0	0	0	0	0	ff	7	0	0	0	0	0	0	0	0	0	0	0	0	0
359	Hazda	0	0	0	0	0	ff	7	0	0	0	0	0	0	0	0	0	0	0	0	0
360	Hazda	0	0	0	0	0	ff	7	0	0	0	0	0	0	0	0	0	0	0	0	0
361	Hazda	0	0	0	0	0	ff	7	0	0	0	0	0	0	0	0	0	0	0	0	0
362	Hazda	0	0	0	0	0	ff	7	0	0	0	0	0	0	0	0	0	0	0	0	0
363	Hazda	0	0	0	0	0	ff	7	0	0	0	0	0	0	0	0	0	0	0	0	0
364	Hazda	0	0	0	0	0	ff	7	0	0	0	0	0	0	0	0	0	0	0	0	0
365	Hazda	0	0	0	0	0	ff	7	0	0	0	0	0	0	0	0	0	0	0	0	0
366	Hazda	0	0	0	0	0	ff	7	1	0	1	1	0	0	1	1	1	1	1	1	1
367	Hazda	0	1	0	0	1	ff	7	1	1	1	1	0	1	1	1	1	1	1	1	1
368	Hazda	0	0	1	0	0	ff	7	1	0	1	0	0	1	1	1	1	1	1	1	1
369	Hazda	0	1	0	0	0	ff	7	1	1	0	1	0	1	1	1	1	1	1	1	1
370	Hazda	0.078125	0	0	0	0	ff	7	0	0	0	0	0	0	0	0	0	0	0	0	0
371	Hazda	0	0	0	0	0	ff	7	0	0	0	0	0	0	0	0	0	0	0	0	0
372	Hazda	0.0546875	0	0	0	0	ff	7	0	0	0	0	0	0	0	0	0	0	0	0	0
373	Hazda	0	0	0	0	0	ff	7	0	0	0	0	0	0	0	0	0	0	0	0	0
374	Hazda	0	0	0	0	0	ff	7	0	0	0	0	0	0	0	0	0	0	0	0	0
375	Hazda	0	0	0	0	0	ff	7	0	0	0	0	0	0	0	0	0	0	0	0	0
376	Hazda	0.15625	0	0	0	0	ff	7	0	0	0	0	0	0	0	0	0	0	0	0	0
377	Hazda	0	0	0	0	0	ff	7	0	0	0	0	0	0	0	0	0	0	0	0	0
378	Hazda	0.0234375	0	0	0	0	ff	7	0	0	0	0	0	0	0	0	0	0	0	0	0
379	Hazda	0	0	0	0	0	ff	7	0	0	0	0	0	0	0	0	0	0	0	0	0
380	Hazda	0.171875	0	0	0	0	ff	7	0	0	0	0	0	0	0	0	0	0	0	0	0
381	Hazda	0.5	0	1	0	1	ff	7	1	1	1	1	1	1	1	1	1	1	1	1	1
382	Hazda	0.125	0	0	0	0	ff	7	0	0	0	0	0	0	0	0	0	0	0	0	0
383	Hazda	0	0	1	0	0	ff	7	1	0	1	1	1	1	1	1	1	0	1	1	1
384	Hazda	0	0	0	0	0	ff	7	1	0	0	1	0	1	1	1	1	0	1	1	1
385	Hazda	0.0625	0	0	0	0	ff	7	1	0	0	1	1	1	1	1	1	1	0	1	1
386	Hazda	0	0	0	0	0	ff	7	1	0	0	1	1	1	0	1	1	1	1	1	1
387	Hazda	0	0	0	0	0	ff	7	1	0	0	1	0	1	1	1	1	1	1	1	1
388	Hazda	0	0	0	0	0	ff	7	1	1	1	1	1	1	1	1	1	1	1	1	1
389	Hazda	0	0	0	0	0	ff	7	0	0	0	0	0	0	0	0	0	0	0	0	0
390	Hazda	0.015625	0	1	0	0	ff	7	0	0	0	0	0	0	0	0	0	0	0	0	0
391	Hazda	0.0078125	0	0	0	0	ff	7	0	0	0	0	0	0	0	0	0	0	0	0	0
392	Hazda	0.015625	0	0	0	0	ff	7	0	0	0	0	0	0	0	0	0	0	0	0	0
393	Hazda	0.125	0	1	0	0	ff	7	0	0	0	0	0	0	0	0	0	0	0	0	0
394	Hazda	0	0	1	0	0	ff	7	0	0	0	0	0	0	0	0	0	0	0	0	0
395	Hazda	0	0	0	0	0	ff	7	0	0	0	0	0	0	0	0	0	0	0	0	0
396	Hazda	0	0	1	0	0	ff	7	1	1	1	1	1	0	0	0	0	1	1	1	1
397	Hazda	0	0	0	0	0	ff	7	0	0	0	0	0	0	0	0	0	0	0	0	0
398	Hazda	0.015625	0	0	0	0	ff	7	0	0	0	0	0	0	0	0	0	0	0	0	0
399	Hazda	0.046875	0	0	0	0	ff	7	0	0	0	0	0	0	0	0	0	0	0	0	0
400	Hazda	0	0	0	0	0	ff	7	0	0	0	0	0	0	0	0	0	0	0	0	0
401	Hazda	0	0	0	0	0	ff	7	0	0	0	0	0	0	0	0	0	0	0	0	0
402	Hazda	0	0	0	0	0	ff	7	0	0	0	0	0	0	0	0	0	0	0	0	0
403	Hazda	0	0	0	0	0	ff	7	0	0	0	0	0	0	0	0	0	0	0	0	0
404	Hazda	0	0	0	0	0	ff	7	0	0	0	0	0	0	0	0	0	0	0	0	0
405	Hazda	0	0	0	0	0	ff	7	1	0	1	1	1	1	1	1	1	1	1	1	1
406	Hazda	0	0	0	0	0	ff	7	1	0	0	0	0	0	0	0	0	0	1	0	0
407	Hazda	0	0	0	0	1	ff	7	1	1	1	1	1	1	1	1	1	1	1	1	1
408	Hazda	0	0	0	0	0	ff	7	1	0	1	1	1	1	1	1	1	1	1	1	1
409	Hazda	0.0078125	0	0	0	0	ff	7	1	0	0	1	1	1	1	1	1	1	1	0	1
410	Hazda	0.0410156	0	0	0	0	ff	7	1	0	0	1	1	1	1	1	1	1	1	1	1
411	Hazda	0.0625	0	0	0	0	ff	7	1	0	1	1	0	1	1	1	1	1	1	0	1
412	Hazda	0	0	0	0	0	ff	7	0	0	0	1	0	1	1	1	1	1	1	1	1
413	Hazda	0	0	0	0	0	ff	7	0	0	0	0	0	0	0	0	0	0	0	0	0
414	Hazda	0	0	0	0	0	ff	7	0	0	0	0	0	0	0	0	0	0	0	0	0
415	Hazda	0	0	0	0	0	ff	7	0	0	0	0	0	0	0	0	0	0	0	0	0
416	Hazda	0.015625	0	0	0	0	ff	7	0	0	0	0	0	0	0	0	0	0	0	0	0
417	Hazda	0	0	0	0	0	ff	7	0	0	0	0	0	0	0	0	0	0	0	0	0
418	Hazda	0	0	1	0	0	ff	7	0	0	0	0	0	0	0	0	0	0	1	1	0
419	Hazda	0	0	0	0	0	ff	7	0	0	0	0	0	0	0	0	0	0	0	0	0
420	Hazda	0	0	0	0	0	ff	7	0	1	0	1	1	1	1	1	1	1	1	1	1
421	Hazda	0	0	0	0	0	ff	7	0	0	0	0	0	0	0	0	0	0	0	0	0
422	Hazda	0	0	0	0	0	ff	7	0	0	0	0	0	0	0	0	0	0	0	0	0
423	Hazda	0	0	0	0	0	ff	7	0	0	0	0	0	0	0	0	0	0	0	0	0
424	Hazda	0	0	0	0	0	ff	7	0	0	0	0	0	0	0	0	0	0	0	0	0
425	Hazda	0	0	0	0	0	ff	7	1	0	0	0	0	1	1	1	1	1	1	1	1
426	Hazda	0	0	0	0	0	ff	7	1	1	0	0	0	1	1	1	1	1	1	1	1
427	Hazda	0	0	0	0	0	ff	7	1	1	0	1	0	1	1	1	0	1	1	1	1
428	Hazda	0	0	0	0	0	ff	7	1	1	1	0	0	0	1	1	0	1	1	1	1
429	Hazda	0	0	0	0	0	ff	7	0	0	0	0	0	0	0	0	0	0	0	0	0
430	Hazda	0	0	0	0	0	ff	7	1	0	0	1	0	0	0	1	1	1	1	1	1
431	Hazda	0	0	1	0	0	ff	7	1	0	1	1	0	1	0	1	0	1	1	1	0
432	Hazda	0	0	0	0	0	ff	7	0	0	0	0	0	0	0	0	0	0	0	0	0
433	Hazda	0	0	0	0	0	ff	7	0	0	0	0	0	0	0	0	0	0	0	0	0
434	Hazda	0	0	0	0	0	ff	7	0	0	0	0	0	0	0	0	0	0	0	0	0
435	Hazda	0	0	0	0	0	ff	7	0	0	0	0	0	0	0	0	0	0	0	0	0
436	Hazda	0	0	0	0	0	ff	7	0	0	0	0	0	0	0	0	0	0	0	0	0
437	Hazda	0	0	0	0	0	ff	7	0	0	0	0	0	0	0	0	0	0	0	0	0
438	Hazda	0	0	0	0	0	ff	7	1	1	0	0	1	1	0	0	1	1	1	0	1
439	Hazda	0	0	0	0	0	ff	7	0	0	0	0	0	0	0	0	0	0	0	0	0
440	Hazda	0	0	0	0	0	ff	7	1	0	0	0	0	0	0	0	0	0	0	1	0
441	Hazda	0.0625	0	0	0	0	ff	7	1	1	0	0	0	0	0	1	1	1	1	1	1
442	Hazda	0	0	1	0	1	ff	7	1	0	1	0	0	0	0	1	1	0	1	0	1
443	Hazda	0.125	0	0	0	0	ff	7	1	0	0	1	0	1	0	1	1	1	1	1	1
444	Hazda	0.125	0	0	0	0	ff	7	0	0	0	0	0	0	0	0	0	0	0	0	0
445	Hazda	0	0	1	0	0	ff	7	0	0	0	0	0	0	0	0	0	0	0	0	0
446	Hazda	0	0	0	0	0	ff	7	1	0	0	1	0	1	1	1	1	1	1	1	1
447	Hazda	0	0	0	0	0	ff	7	0	0	0	0	0	0	0	0	0	0	0	0	0
448	Hazda	0	0	0	0	0	ff	7	0	0	0	0	0	0	0	0	0	0	0	0	0
449	Hazda	0	0	0	0	0	ff	7	0	0	0	0	0	0	0	0	0	0	0	0	0
450	Hazda	0	0	0	0	0	ff	7	1	1	0	1	1	1	1	1	1	1	1	1	1
451	Hazda	0	0	1	0	0	ff	7	1	0	0	1	0	0	0	1	0	0	1	0	1
452	Hazda	0	0	0	0	0	ff	7	1	1	1	1	0	1	1	1	1	1	1	1	1
453	Hazda	0	0	0	0	0	ff	7	0	0	0	0	0	0	0	0	0	0	0	0	0
454	Hazda	0	0	0	0	0	ff	7	1	0	0	1	1	1	1	1	1	1	1	1	1
455	Hazda	0	0	0	0	0	ff	7	1	1	0	1	1	1	1	1	1	1	0	1	1
456	Hazda	0	0	0	0	0	ff	7	0	0	0	0	0	0	0	0	0	0	0	0	0
457	Hazda	0	0	0	0	0	ff	7	0	0	0	0	0	0	0	0	0	0	0	0	0
458	Hazda	0	0	0	0	0	ff	7	0	0	0	0	0	0	0	0	0	0	0	0	0
459	Hazda	0	0	0	0	0	ff	7	0	0	0	0	0	0	0	0	0	0	0	0	0
460	Hazda	0	0	0	0	0	ff	7	0	0	0	0	0	0	0	0	0	0	0	0	0
461	Hazda	0	1	0	0	0	ff	7	0	0	0	0	0	0	0	0	0	0	0	0	0
462	Hazda	0.03125	0	0	0	0	ff	7	0	0	0	0	0	0	0	0	0	0	0	0	0
463	Hazda	0	0	0	0	0	ff	7	0	0	0	0	0	0	0	0	0	0	0	0	0
464	Hazda	0	0	0	0	0	ff	7	1	1	0	0	0	0	0	0	0	1	0	1	1
465	Hazda	0	0	0	0	0	ff	7	1	1	0	0	0	1	0	1	0	1	1	1	1
466	Hazda	0	0	0	0	0	ff	7	1	1	0	0	1	1	0	0	0	1	0	1	1
467	Hazda	0	0	0	0	0	ff	7	1	1	0	0	0	0	0	1	1	1	1	1	1
468	Hazda	0	0	1	0	0	ff	7	0	0	0	0	0	0	0	0	0	0	0	0	0
469	Hazda	0	0	0	0	0	ff	7	0	0	0	0	0	0	0	0	0	0	0	0	0
470	Hazda	0	0	0	0	0	ff	7	0	0	0	0	0	0	0	0	0	0	0	0	0
471	Hazda	0	0	0	0	0	ff	7	0	0	0	0	0	0	0	0	0	0	0	0	0
472	Hazda	0	0	0	0	0	ff	7	0	0	0	0	0	0	0	0	0	0	0	0	0
473	Hazda	0	0	1	0	0	ff	7	0	0	0	0	0	0	0	0	0	0	0	0	0
474	Hazda	0	0	0	0	0	ff	7	0	0	0	0	0	0	0	0	0	0	0	0	0
475	Hazda	0.03125	0	0	0	0	ff	7	0	0	0	0	0	0	0	0	0	0	0	0	0
476	Hazda	0.132812	0	0	0	0	ff	7	0	0	0	0	0	0	0	0	0	0	0	0	0
477	Hazda	0	0	0	0	0	ff	7	0	0	0	0	0	0	0	0	0	0	0	0	0
478	Hazda	0	0	0	0	0	ff	7	0	0	0	0	0	0	0	0	0	0	0	0	0
479	Hazda	0	0	0	0	0	ff	7	0	0	0	0	0	0	0	0	0	0	0	0	0
480	Hazda	0	0	0	0	0	ff	7	0	0	0	0	0	0	0	0	0	0	0	0	0
481	Hazda	0	0	0	0	0	ff	7	0	0	0	0	0	0	0	0	0	0	0	0	0
482	Hazda	0	0	0	0	0	ff	7	0	0	0	0	0	0	0	0	0	0	0	0	0
483	Hazda	0	0	0	0	0	ff	7	1	1	0	0	0	1	1	1	1	0	1	1	1
484	Hazda	0	0	0	0	0	ff	7	0	0	0	0	0	0	0	0	0	0	0	0	0
485	Hazda	0	0	0	0	0	ff	7	0	0	0	0	0	0	0	0	0	0	0	0	0
486	Hazda	0.0292969	0	0	0	0	ff	7	0	0	0	0	0	0	0	0	0	0	0	0	0
487	Hazda	0.0449219	0	0	0	0	ff	7	0	0	0	0	0	0	0	0	0	0	0	0	0
488	Hazda	0.164062	0	0	0	0	ff	7	1	1	1	1	0	1	1	1	1	1	1	1	1
489	Hazda	0	0	0	0	0	ff	7	0	0	0	0	0	0	0	0	0	0	0	0	0
490	Hazda	0	0	1	0	0	ff	7	1	1	1	1	0	1	1	0	1	1	1	1	1
491	Hazda	0	0	1	0	0	ff	7	1	1	1	1	0	1	1	0	1	1	1	1	1
492	Hazda	0	0	0	0	0	ff	7	0	0	0	0	0	0	0	0	0	0	0	0	0
493	Hazda	0	0	0	0	0	ff	7	0	0	0	0	0	0	0	0	0	0	0	0	0
494	Hazda	0	0	0	0	0	ff	7	0	0	0	0	0	0	0	0	0	0	0	0	0
495	Hazda	0	0	0	0	0	ff	7	0	0	0	0	0	0	0	0	0	0	0	0	0
496	Hazda	0	0	0	0	0	ff	7	0	0	0	0	0	0	0	0	0	0	0	0	0
497	Hazda	0	0	0	0	0	ff	7	1	0	0	1	0	0	1	1	1	1	1	1	1
498	Hazda	0	0	0	0	0	ff	7	0	0	0	0	0	0	0	0	0	0	0	0	0
499	Hazda	0	1	0	0	0	ff	7	1	1	0	1	1	1	1	1	1	1	1	1	1
500	Hazda	0	1	0	1	1	ff	7	1	1	1	1	1	1	1	1	1	1	1	1	1
501	Hazda	0	0	0	0	0	ff	7	0	0	0	0	0	0	0	0	0	0	0	0	0
502	Hazda	0	0	0	0	0	ff	7	0	0	0	0	0	0	0	0	0	0	0	0	0
503	Hazda	0	0	0	0	0	ff	7	0	0	0	0	0	0	0	0	0	0	0	0	0
504	Hazda	0.25	0	0	0	0	ff	7	0	0	0	0	0	0	0	0	0	0	0	0	0
505	Hazda	0	0	0	0	0	ff	7	0	0	0	0	0	0	0	0	0	0	0	0	0
506	Hazda	0	0	0	0	0	ff	7	0	0	0	0	0	0	0	0	0	0	0	0	0
507	Hazda	0	0	0	0	0	ff	7	0	0	0	0	0	0	0	0	0	0	0	0	0
508	Hazda	0	0	0	1	0	ff	7	1	1	1	0	1	1	0	0	0	1	0	1	1
509	Hazda	0	0	0	0	0	ff	7	1	1	0	0	0	0	0	1	0	1	0	0	1
510	Hazda	0	0	0	0	0	ff	7	0	0	0	0	0	0	0	0	0	0	0	0	0
511	Hazda	0	0	0	0	0	ff	7	0	0	0	0	0	0	0	0	0	0	0	0	0
512	Hazda	0	0	0	0	0	ff	7	0	0	0	0	0	0	0	0	0	0	0	0	0
513	Hazda	0	0	0	0	0	ff	7	1	1	0	1	0	1	0	0	0	1	0	1	1
514	Hazda	0.5	0	1	0	0	ff	7	1	1	1	0	0	0	1	1	1	1	0	1	1
515	Hazda	0	0	0	0	0	ff	7	0	0	0	0	0	0	0	0	0	0	0	0	0
516	Hazda	0	0	1	0	0	ff	7	0	0	0	0	0	0	0	0	0	0	0	0	0
517	Hazda	0	0	0	0	0	ff	7	0	0	0	0	0	0	0	0	0	0	0	0	0
518	Hazda	0	0	0	0	0	ff	7	0	0	0	0	0	0	0	0	0	0	0	0	0
519	Hazda	0	0	0	0	0	ff	7	0	0	0	0	0	0	0	0	0	0	0	0	0
520	Hazda	0	0	0	0	0	ff	7	0	0	0	0	0	0	0	0	0	0	0	0	0
521	Hazda	0	0	0	0	0	ff	7	0	0	0	0	0	0	0	0	0	0	0	0	0
522	Hazda	0	0	0	0	0	ff	7	0	0	0	0	0	0	0	0	0	0	0	0	0
523	Hazda	0.25	0	0	0	0	ff	7	0	0	0	0	0	0	0	0	0	0	0	0	0
524	Hazda	0	0	0	0	0	ff	7	0	0	0	0	0	0	0	0	0	0	0	0	0
525	Hazda	0	0	0	0	0	ff	7	0	0	0	0	0	0	0	0	0	0	0	0	0
526	Hazda	0.015625	0	0	0	0	ff	7	0	0	0	0	0	0	0	0	0	0	0	0	0
527	Hazda	0	0	0	0	0	ff	7	0	1	0	0	0	0	0	0	0	0	0	0	0
528	Hazda	0.0078125	0	0	0	0	ff	7	0	0	0	0	0	0	0	0	0	0	0	0	0
529	Hazda	0	0	0	1	1	ff	7	1	1	0	1	1	1	1	1	1	1	1	1	1
530	Hazda	0	0	0	0	0	ff	7	0	0	0	0	0	0	0	0	0	0	0	0	0
531	Hazda	0.03125	0	0	0	0	ff	7	1	0	0	1	0	0	1	1	1	1	1	1	1
532	Hazda	0.0078125	0	0	0	0	ff	7	0	0	0	0	0	0	0	0	0	0	0	0	0
533	Hazda	0	1	0	0	0	ff	7	0	0	0	0	0	0	0	0	0	0	0	0	0
534	Hazda	0	0	0	0	0	ff	7	0	0	0	0	0	0	0	0	0	0	0	0	0
535	Hazda	0	0	0	0	0	ff	7	1	1	0	0	0	0	0	0	0	0	1	1	1
536	Hazda	0.015625	0	0	0	0	ff	7	0	0	0	0	0	0	0	0	0	0	0	0	0
537	Hazda	0	0	1	0	0	ff	7	1	1	1	0	0	0	0	0	0	0	1	1	0
538	Hazda	0.078125	0	0	0	0	ff	7	0	0	0	0	0	0	0	0	0	0	0	0	0
539	Hazda	0.0625	1	0	0	0	ff	7	1	1	0	0	0	0	0	0	1	0	1	1	0
540	Hazda	0	0	0	0	0	ff	7	0	0	0	0	0	0	0	0	0	0	0	0	0
541	Hazda	0.0195313	0	0	0	0	ff	7	1	1	1	1	1	1	1	1	1	1	1	1	1
542	Hazda	0	0	0	0	0	ff	7	0	0	0	0	0	0	0	0	0	0	0	0	0
543	Hazda	0.125	0	0	0	0	ff	7	1	0	0	1	0	0	1	1	1	1	1	1	1
544	Hazda	0.015625	0	1	1	0	ff	7	1	0	1	1	1	1	1	1	1	1	1	1	1
545	Hazda	0.125	0	0	0	0	ff	7	0	0	0	0	0	0	0	0	0	0	0	0	0
546	Hazda	0	0	1	0	0	ff	7	0	0	0	0	0	0	0	0	0	0	0	0	0
547	Hazda	0	0	0	0	0	ff	7	0	0	0	0	0	0	0	0	0	0	0	0	0
548	Hazda	0	0	0	0	0	ff	7	0	0	0	0	0	0	0	0	0	0	0	0	0
549	Hazda	0	0	0	0	0	ff	7	0	0	0	0	0	0	0	0	0	0	0	0	0
550	Hazda	0	0	0	0	0	ff	7	0	0	0	0	0	0	0	0	0	0	0	0	0
551	Hazda	0	0	0	0	0	ff	7	0	0	0	0	0	0	0	0	0	0	0	0	0
552	Hazda	0	0	0	0	0	ff	7	0	0	0	0	0	0	0	0	0	0	0	0	0
553	Hazda	0	0	0	1	0	ff	7	1	1	0	1	1	1	1	1	1	1	1	1	1
554	Hazda	0	0	0	0	0	ff	7	1	0	0	1	1	1	1	1	1	1	1	1	1
555	Hazda	0	0	0	0	0	ff	7	1	0	0	1	0	0	1	1	1	0	1	1	1
556	Hazda	0	0	0	1	0	ff	7	1	0	0	1	0	0	1	1	1	1	1	1	1
557	Hazda	0	0	0	0	0	ff	7	0	0	0	0	0	0	0	0	0	0	0	0	0
558	Hazda	0	0	1	0	0	ff	7	1	0	1	1	0	1	1	1	1	1	1	1	1
559	Hazda	0	0	0	1	0	ff	7	1	1	1	1	1	1	1	1	1	1	1	1	1
560	Hazda	0	0	0	0	0	ff	7	1	1	0	1	0	0	1	1	1	0	1	1	1
561	Hazda	0	0	0	0	0	ff	7	1	1	1	1	0	0	1	1	1	1	1	1	1
562	Hazda	0	0	0	0	0	ff	7	0	0	0	0	0	0	0	0	0	0	0	0	0
563	Hazda	0	0	0	0	0	ff	7	0	0	0	0	0	0	0	0	0	0	0	0	0
564	Hazda	0	0	0	0	0	ff	7	0	0	0	0	0	0	0	0	0	0	0	0	0
565	Hazda	0	0	0	0	0	ff	7	0	1	0	0	1	1	0	0	1	1	0	0	1
566	Hazda	0	0	0	1	1	ff	7	1	1	0	0	1	1	0	1	1	0	0	1	1
567	Hazda	0.0625	0	0	0	0	ff	7	0	1	0	0	0	0	0	0	0	0	0	0	0
568	Hazda	0	0	0	0	0	ff	7	0	0	0	0	0	0	0	0	0	0	0	0	0
569	Hazda	0.03125	0	0	0	0	ff	7	0	0	0	0	0	0	0	0	0	0	0	0	0
570	Hazda	0	0	0	0	0	ff	7	0	0	0	0	0	0	0	0	0	0	0	0	0
571	Hazda	0.015625	0	1	0	0	ff	7	1	0	1	0	1	0	0	0	0	0	1	1	1
572	Hazda	0	0	0	0	0	ff	7	0	0	0	0	0	0	0	0	0	0	0	0	0
573	Hazda	0.0234375	0	0	0	0	ff	7	0	0	0	0	0	0	0	0	0	0	0	0	0
574	Hazda	0.0273438	1	0	0	0	ff	7	1	1	1	1	1	1	1	1	1	1	1	1	1
575	Hazda	0.0078125	0	0	0	0	ff	7	0	0	0	0	0	0	0	0	0	0	0	0	0
576	Hazda	0.0195313	1	0	1	0	ff	7	1	1	1	1	1	1	1	1	1	0	1	1	1
577	Hazda	0	0	0	0	0	ff	7	1	1	0	0	0	0	0	0	0	1	0	1	0
578	Hazda	0	0	0	1	0	ff	7	1	1	0	0	0	1	0	1	0	1	0	1	1
579	Hazda	0	0	0	1	1	ff	7	1	1	1	0	0	0	0	0	0	1	0	1	0
580	Hazda	0	0	0	0	0	ff	7	1	1	0	0	0	0	0	0	0	1	0	1	0
581	Hazda	0	0	0	0	0	ff	7	0	0	0	0	0	0	0	0	0	0	0	0	0
582	Hazda	0.0449219	0	0	0	0	ff	7	0	0	0	0	0	0	0	0	0	0	0	0	0
583	Hazda	0.0449219	0	0	0	0	ff	7	0	0	0	0	0	0	0	0	0	0	0	0	0
584	Hazda	0	0	0	0	0	ff	7	0	0	0	0	0	0	0	0	0	0	0	0	0
585	Hazda	0.0625	0	0	0	0	ff	7	0	0	0	0	0	0	0	0	0	0	0	0	0
586	Hazda	0	0	0	0	0	ff	7	0	0	0	0	0	0	0	0	0	0	0	0	0
587	Hazda	0	0	0	0	0	ff	7	0	0	0	0	0	0	0	0	0	0	0	0	0
588	Hazda	0	0	0	1	0	ff	7	1	1	0	0	0	0	0	0	0	1	1	1	0
619	Hazda	0	0	0	0	0	mm	7	0	1	0	0	0	0	0	0	0	0	1	0	1
620	Hazda	0	0	0	1	1	mm	7	1	1	1	1	0	0	1	0	1	0	1	1	1
621	Hazda	0	0	0	0	0	mm	7	1	1	1	1	0	0	1	1	1	0	1	1	1
622	Hazda	0	0	1	1	0	mm	7	1	1	1	1	0	0	1	1	1	1	0	1	1
623	Hazda	0.03125	0	0	0	0	mm	7	0	0	0	0	0	0	0	0	0	0	0	0	0
624	Hazda	0	0	0	1	0	mm	7	0	0	1	0	1	0	1	0	1	0	1	1	1
625	Hazda	0.03125	0	0	0	0	mm	7	0	0	0	0	0	0	0	0	0	0	0	0	0
626	Hazda	0	0	0	0	0	mm	7	1	1	1	0	0	0	0	0	0	0	0	1	0
627	Hazda	0	1	0	1	0	mm	7	1	1	1	0	0	0	0	0	1	0	1	1	1
628	Hazda	0	0	0	0	0	mm	7	0	0	0	0	0	0	0	0	0	0	0	0	1
629	Hazda	0.015625	0	0	0	0	mm	7	0	0	0	0	0	0	0	0	0	0	0	0	0
630	Hazda	0	0	0	0	0	mm	7	0	1	0	0	0	0	0	0	0	0	0	1	0
631	Hazda	0	0	1	1	0	mm	7	1	1	0	0	0	0	0	0	1	1	0	1	1
632	Hazda	0	0	0	1	0	mm	7	1	0	0	1	0	0	0	0	0	0	1	1	1
633	Hazda	0	0	1	1	0	mm	7	1	1	0	0	0	0	0	0	1	0	1	0	1
634	Hazda	0	0	1	1	0	mm	7	1	1	0	1	0	0	0	0	0	0	1	1	0
635	Hazda	0	0	0	1	0	mm	7	1	0	0	0	0	0	0	0	0	0	0	1	1
636	Hazda	0	0	0	0	0	mm	7	0	0	0	0	0	0	0	0	0	0	0	0	0
637	Hazda	0.5	0	1	1	0	mm	7	1	1	1	1	0	0	0	0	1	1	1	1	1
638	Hazda	0	0	0	0	0	mm	7	1	1	0	0	0	0	0	0	0	1	0	1	0
639	Hazda	0	0	1	0	0	mm	7	0	0	0	0	0	0	0	0	0	0	0	0	0
640	Hazda	0	0	0	0	0	mm	7	0	0	0	0	0	0	0	0	0	0	0	0	0
641	Hazda	0	0	1	0	0	mm	7	1	1	1	0	0	0	0	0	1	0	0	1	0
642	Hazda	0	0	1	1	0	mm	7	1	1	0	1	0	1	1	0	0	1	1	1	1
643	Hazda	0	0	0	1	0	mm	7	1	1	0	1	1	1	0	1	1	1	1	1	1
648	Hazda	0.03125	0	0	0	0	mm	7	0	0	0	0	0	0	0	0	0	0	0	0	0
649	Hazda	0	0	0	0	0	mm	7	0	0	0	0	0	0	0	0	0	0	0	0	0
650	Hazda	0	0	0	0	0	mm	7	0	0	0	0	0	0	0	0	0	0	0	0	0
651	Hazda	0	0	0	0	0	mm	7	0	0	0	0	0	0	0	0	0	0	0	0	0
652	Hazda	0	0	0	0	0	mm	7	0	0	0	0	0	0	0	0	1	0	1	0	0
653	Hazda	0	0	0	0	0	mm	7	0	0	0	0	0	0	0	0	0	0	0	0	0
654	Hazda	0	0	0	1	0	mm	7	1	1	0	0	1	1	1	1	0	1	0	1	1
656	Hazda	0	1	0	1	0	ff	7	1	1	1	1	1	1	1	1	1	1	1	1	1
657	Hazda	0	0	0	1	0	ff	7	1	1	1	1	1	1	1	1	1	1	1	1	1
658	Hazda	0	0	0	1	0	ff	7	1	1	1	1	1	1	1	1	1	1	1	1	1
659	Hazda	0	0	0	1	0	ff	7	1	1	1	1	1	1	1	1	1	1	1	1	1
660	Hazda	0	0	1	1	0	ff	7	1	1	1	1	1	1	1	1	1	1	1	1	1
661	Hazda	0	0	0	1	0	ff	7	1	1	1	1	1	1	1	1	1	1	1	1	1
662	Hazda	0	0	0	1	0	ff	7	1	1	1	1	1	1	1	1	1	1	1	1	1
663	Hazda	0	0	0	0	0	ff	7	0	0	0	0	0	0	0	0	0	0	0	0	0
664	Hazda	0	0	0	1	0	ff	7	1	1	1	1	1	1	1	1	1	1	1	1	1
665	Hazda	0	0	0	0	0	ff	7	0	0	0	0	0	0	0	0	0	0	0	0	0
666	Hazda	0	0	0	0	0	ff	7	0	0	0	0	0	0	0	0	0	0	0	0	0
667	Hazda	0	0	0	1	0	mm	7	1	1	1	1	0	1	1	1	1	0	1	1	1
668	Hazda	0	0	0	0	0	mm	7	0	1	0	0	0	0	0	0	0	0	1	0	1
669	Hazda	0	0	0	1	0	mm	7	1	1	0	1	1	1	1	1	1	1	1	1	1
670	Hazda	0	0	1	1	1	mm	7	1	1	1	1	1	1	1	1	1	1	1	1	1
671	Hazda	0	0	0	0	0	mm	7	0	0	0	0	0	0	0	0	0	0	0	0	0
672	Hazda	0	0	0	0	0	mm	7	0	0	0	0	0	0	0	0	0	0	0	0	0
673	Hazda	0	0	0	0	0	mm	7	0	0	0	0	0	0	0	0	0	0	1	0	0
674	Hazda	0	0	0	1	0	mm	7	1	1	1	1	0	0	1	1	1	1	1	1	1
675	Hazda	0.25	0	0	1	0	mm	7	1	1	0	1	0	0	1	1	0	0	1	1	0
676	Hazda	0.25	0	0	1	0	mm	7	1	1	0	0	0	0	0	0	0	0	0	1	1
677	Hazda	0	0	1	0	0	mm	7	1	1	1	0	0	0	0	0	0	0	0	1	0
678	Hazda	0	0	0	1	0	mm	7	1	1	1	1	0	0	1	1	1	1	1	1	1
679	Hazda	0	0	0	0	0	mm	7	0	0	0	0	0	0	0	0	0	0	0	0	0
680	Hazda	0	0	0	1	0	mm	7	1	1	0	1	1	1	0	0	1	1	1	1	1
681	Hazda	0.0859375	0	0	1	0	mm	7	1	0	0	1	0	0	1	1	1	0	1	1	1
682	Hazda	0.0625	0	0	0	0	mm	7	0	0	0	0	0	0	0	0	0	0	0	0	0
683	Hazda	0.0625	0	0	0	0	mm	7	0	0	0	0	0	0	0	0	0	0	0	0	0
684	Hazda	0	0	0	0	0	mm	7	0	0	0	0	0	0	0	0	0	0	0	0	0
685	Hazda	0	0	0	0	0	mm	7	1	1	1	1	0	0	0	0	1	1	1	0	1
686	Hazda	0.046875	0	0	1	0	mm	7	1	1	0	1	0	0	1	1	0	0	1	0	1
687	Hazda	0	0	0	1	0	mm	7	1	1	1	1	0	0	0	1	1	1	1	1	1
688	Hazda	0	0	0	1	0	mm	7	0	0	0	0	0	0	1	1	1	0	1	1	1
689	Hazda	0	0	0	1	0	mm	7	1	0	0	0	0	0	1	1	0	0	1	1	1
690	Hazda	0.03125	0	0	1	0	mm	7	1	1	0	0	0	0	0	1	1	1	1	1	0
691	Hazda	0	0	1	0	0	ff	7	0	1	1	0	0	0	0	1	0	1	0	0	1
692	Hazda	0.0078125	0	0	0	0	ff	7	0	0	0	0	0	0	0	0	0	0	0	0	0
693	Hazda	0	0	0	0	0	ff	7	0	0	0	0	0	0	0	0	0	0	0	0	0
697	Hazda	0	0	0	0	0	ff	7	0	0	0	0	0	0	0	0	0	0	0	0	0
699	Hazda	0	0	0	0	0	ff	7	0	0	0	0	0	0	0	0	0	0	0	0	0
700	Hazda	0	0	0	0	0	ff	7	0	0	0	0	0	0	0	0	0	0	0	0	0
702	Hazda	0	0	0	0	0	ff	7	0	0	0	0	0	0	0	0	0	0	0	0	0
703	Hazda	0	0	0	0	0	ff	7	0	0	0	0	0	0	0	0	0	0	0	0	0
705	Hazda	0	0	0	0	0	ff	7	0	0	0	0	0	0	0	0	0	0	0	0	0
707	Hazda	0	0	0	0	0	ff	7	0	0	0	0	0	0	0	0	0	0	0	0	0
708	Hazda	0	0	0	0	0	ff	7	0	0	0	0	0	0	0	0	0	0	0	0	0
709	Hazda	0.265625	0	0	0	0	ff	7	0	0	0	0	0	0	0	0	0	0	0	0	0
710	Hazda	0.09375	0	0	0	0	ff	7	0	0	0	0	0	0	0	0	0	0	0	0	0
712	Hazda	0	0	0	0	0	ff	7	0	0	0	0	0	0	0	0	0	0	0	0	0
713	Hazda	0	0	0	0	0	ff	7	0	0	0	0	0	0	0	0	0	0	0	0	0
714	Hazda	0.0039063	0	0	0	0	ff	7	0	0	0	0	0	0	0	0	0	0	0	0	0
715	Hazda	0.28125	0	0	0	0	mm	7	0	0	0	0	0	0	0	0	0	0	0	0	0
716	Hazda	0	0	1	0	0	mm	7	1	1	0	1	0	1	1	1	1	1	1	0	1
717	Hazda	0	0	1	0	0	mm	7	1	1	0	0	0	0	0	1	0	0	0	0	1
718	Hazda	0.015625	0	0	0	1	mm	7	1	1	0	0	0	0	1	1	1	0	1	1	1
719	Hazda	0	0	0	0	0	mm	7	0	0	0	0	0	0	0	0	0	0	0	0	0
720	Hazda	0	0	0	0	0	mm	7	0	0	0	0	0	0	0	0	0	0	0	0	0
721	Hazda	0	0	0	0	0	mm	7	0	0	0	0	0	0	0	0	0	0	0	0	0
722	Hazda	0	1	0	0	0	mm	7	0	0	0	0	0	0	0	0	0	0	0	0	0
723	Hazda	0	0	0	0	0	mm	7	0	0	0	0	0	0	0	0	0	0	0	0	0
724	Hazda	0	0	0	0	0	mm	7	0	0	0	0	0	0	0	0	0	0	0	0	0
725	Hazda	0	0	0	0	0	mm	7	0	0	0	0	0	0	0	0	0	0	0	0	0
726	Hazda	0	1	0	0	0	mm	7	0	1	0	0	0	0	1	0	0	0	1	0	0
727	Hazda	0.0078125	1	0	1	0	mm	7	1	1	1	1	1	1	1	1	1	1	1	1	1
728	Hazda	0.015625	1	0	1	0	mm	7	1	1	0	1	1	1	1	1	1	1	1	1	1
729	Hazda	0	0	0	1	0	mm	7	1	1	0	1	1	1	1	1	1	1	1	0	1
730	Hazda	0.0625	0	0	1	0	mm	7	1	1	0	0	0	0	0	0	1	1	1	1	1
731	Hazda	0	0	0	0	0	mm	7	0	0	0	0	0	0	0	0	0	0	0	0	0
732	Hazda	0	0	0	0	0	mm	7	0	0	0	0	0	0	0	0	0	0	0	0	0
733	Hazda	0.03125	0	0	0	0	mm	7	0	0	0	0	0	0	0	0	0	0	0	0	0
734	Hazda	0	0	0	0	0	mm	7	0	0	0	0	0	0	0	0	0	0	0	0	0
735	Hazda	0	0	0	0	0	mm	7	0	0	0	0	0	0	0	0	0	0	0	0	0
736	Hazda	0	0	0	0	0	mm	7	0	0	0	0	0	0	0	0	0	0	0	0	0
737	Hazda	0	0	0	0	0	mm	7	0	0	0	0	0	0	0	0	0	0	0	0	0
738	Hazda	0	0	0	0	0	mm	7	0	0	0	0	0	0	0	0	0	0	0	0	0
739	Hazda	0	0	0	1	0	ff	7	1	1	0	0	1	1	1	1	1	1	1	1	1
740	Hazda	0	0	0	0	0	ff	7	0	0	0	0	0	0	0	0	0	0	0	0	0
741	Hazda	0	0	0	0	0	ff	7	0	0	0	0	0	0	0	0	0	0	0	0	0
742	Hazda	0	0	0	0	0	ff	7	0	0	0	0	0	0	0	0	0	0	0	0	0
743	Hazda	0	0	1	1	0	ff	7	1	1	0	1	1	1	1	1	1	1	1	1	1
744	Hazda	0	0	0	0	0	ff	7	0	0	0	0	0	0	0	0	0	0	0	0	0
745	Hazda	0	0	0	0	0	ff	7	0	0	0	0	0	0	0	0	0	0	0	0	0
746	Hazda	0	0	0	0	0	ff	7	0	0	0	0	0	0	0	0	0	0	0	0	0
747	Hazda	0	0	0	0	0	ff	7	0	0	0	0	0	0	0	0	0	0	0	0	0
748	Hazda	0	0	0	0	0	ff	7	0	0	0	0	0	0	0	0	0	0	0	0	0
749	Hazda	0	0	0	0	0	ff	7	0	0	0	0	0	0	0	0	0	0	0	0	0
750	Hazda	0.125	0	0	0	0	ff	7	0	0	0	0	0	0	0	0	0	0	0	0	0
751	Hazda	0.03125	0	0	1	0	ff	7	1	1	0	0	0	0	0	1	1	1	0	0	1
752	Hazda	0.5	0	0	1	1	ff	7	1	1	0	1	0	0	1	1	1	1	1	1	1
753	Hazda	0	0	0	1	0	ff	7	1	0	0	0	0	1	1	1	0	1	1	0	1
754	Hazda	0	0	0	0	0	ff	7	0	0	0	0	0	0	0	0	0	0	0	0	0
755	Hazda	0.015625	0	0	0	0	ff	7	0	0	0	0	0	0	0	0	0	0	0	0	0
756	Hazda	0	0	0	0	0	ff	7	0	0	0	0	0	0	0	0	0	0	0	0	0
757	Hazda	0	0	0	0	0	ff	7	0	0	0	0	0	0	0	0	0	0	0	0	0
758	Hazda	0	0	1	1	0	ff	7	1	1	0	0	0	1	1	1	1	1	1	0	1
759	Hazda	0	0	0	0	0	ff	7	0	0	0	0	0	0	0	0	0	0	0	0	0
760	Hazda	0	0	1	0	0	ff	7	0	0	0	0	0	0	0	0	0	1	0	0	1
761	Hazda	0	0	1	0	0	ff	7	0	0	0	0	0	0	0	0	0	0	0	0	0
762	Hazda	0	0	0	0	0	ff	7	0	0	0	0	0	0	0	0	0	0	0	0	0
763	Hazda	0	0	0	0	0	ff	7	0	0	0	0	0	0	0	0	0	0	0	0	0
764	Hazda	0	0	1	0	0	ff	7	0	1	1	0	0	1	1	1	1	1	0	1	1
765	Hazda	0.0234375	0	0	0	0	ff	7	1	1	0	1	1	1	0	1	1	0	1	0	0
766	Hazda	0.015625	0	0	0	0	ff	7	0	0	0	0	0	0	0	0	0	0	0	0	0
767	Hazda	0	0	0	0	0	ff	7	0	0	0	0	0	0	0	0	0	0	0	0	0
768	Hazda	0	0	1	0	0	ff	7	1	0	0	1	1	1	0	0	1	1	1	1	1
769	Hazda	0	0	0	1	0	ff	7	1	1	0	1	1	1	1	1	1	1	1	1	1
770	Hazda	0	0	0	0	0	ff	7	0	0	0	0	0	0	0	0	0	0	0	0	0
771	Hazda	0.25	0	0	0	0	ff	7	0	0	0	0	0	0	0	0	0	0	0	0	0
772	Hazda	0.125	0	0	0	0	ff	7	0	0	0	0	0	0	0	0	0	0	0	0	1
773	Hazda	0	0	1	0	0	ff	7	0	0	0	0	0	0	0	0	0	0	0	0	0
774	Hazda	0	0	0	1	0	ff	7	1	1	1	1	1	1	1	0	0	1	1	1	1
775	Hazda	0	1	0	1	1	mm	7	1	1	0	1	1	1	1	1	1	1	1	1	1
776	Hazda	0.5	0	0	1	0	mm	7	1	1	1	1	1	0	1	1	0	0	1	1	1
777	Hazda	0.046875	0	0	0	0	mm	7	1	0	0	0	0	0	0	0	0	0	0	0	0
778	Hazda	0	0	0	1	0	mm	7	1	1	1	1	1	0	1	1	1	1	1	1	1
779	Hazda	0.0625	0	0	0	0	mm	7	0	0	0	0	0	0	0	0	0	0	0	0	0
780	Hazda	0	0	0	0	0	mm	7	0	0	0	0	0	0	0	0	0	0	0	0	0
781	Hazda	0	0	0	0	0	mm	7	0	0	0	0	0	0	0	0	0	0	0	0	0
782	Hazda	0.0546875	0	0	0	0	mm	7	1	0	1	0	0	0	0	0	0	0	1	1	1
783	Hazda	0.0625	0	1	0	0	mm	7	0	0	0	0	0	0	0	0	0	0	0	0	0
784	Hazda	0.105469	0	1	1	0	mm	7	1	1	1	1	1	1	1	1	1	1	1	1	1
785	Hazda	0	0	1	1	0	mm	7	1	1	1	1	1	1	1	1	1	1	1	1	1
786	Hazda	0.03125	0	0	1	0	mm	7	1	0	1	1	0	0	1	1	1	0	0	1	1
787	Hazda	0.0019531	0	0	0	0	mm	7	0	0	0	0	0	0	0	0	0	0	0	0	0
788	Hazda	0	0	0	0	0	mm	7	0	0	0	0	0	0	0	0	0	0	0	0	0
789	Hazda	0	0	1	0	0	mm	7	0	1	0	0	0	0	0	0	0	0	0	0	0
790	Hazda	0	0	0	0	0	mm	7	0	0	0	0	0	0	0	0	0	0	0	0	0
791	Hazda	0.0625	0	0	0	0	mm	7	0	0	0	0	0	0	0	0	0	0	0	0	0
792	Hazda	0	0	0	0	0	mm	7	0	0	0	0	0	0	0	0	0	0	0	0	0
793	Hazda	0.0703125	0	0	0	0	mm	7	0	0	0	0	0	0	0	0	0	0	0	0	0
794	Hazda	0	0	1	0	0	mm	7	0	0	0	0	0	0	0	0	0	0	0	0	0
795	Hazda	0.03125	0	0	0	0	mm	7	0	0	0	0	0	0	0	0	0	0	0	0	0
796	Hazda	0	0	0	0	0	mm	7	0	0	0	0	0	0	0	0	0	0	0	0	0
797	Hazda	0.0234375	0	0	0	0	mm	7	0	0	0	0	0	0	0	0	0	0	0	0	0
798	Hazda	0	0	0	0	0	mm	7	0	0	0	0	0	0	0	0	0	0	0	0	0
799	Hazda	0	0	0	0	0	mm	7	0	1	0	0	0	0	1	0	0	0	0	0	1
800	Hazda	0.0390625	0	0	1	0	mm	7	1	1	0	0	0	0	1	0	0	1	0	1	1
801	Hazda	0	0	0	0	0	mm	7	0	0	0	0	0	0	0	0	0	0	0	0	0
802	Hazda	0	0	0	0	0	mm	7	1	1	0	0	1	1	1	1	1	1	1	0	1
803	Hazda	0.0625	0	1	0	0	mm	7	1	0	0	0	0	0	0	0	0	0	0	0	1
804	Hazda	0	0	1	0	0	mm	7	0	0	0	0	0	0	1	0	0	0	0	0	1
805	Hazda	0	0	0	0	0	mm	7	0	0	0	0	0	0	0	0	0	0	0	0	0
806	Hazda	0	0	0	0	0	mm	7	1	1	0	1	0	0	0	0	0	0	0	0	1
807	Hazda	0	0	0	0	0	mm	7	0	0	0	0	0	0	0	0	0	0	0	0	0
808	Hazda	0	0	0	0	0	mm	7	0	0	0	0	0	0	0	0	0	0	0	0	0
809	Hazda	0.015625	0	0	0	0	mm	7	0	0	0	0	0	0	0	0	0	0	0	0	0
810	Hazda	0	0	0	0	0	mm	7	0	0	0	0	0	0	0	0	0	0	0	0	0
811	Hazda	0	0	0	1	1	ff	7	1	1	1	1	1	1	1	1	1	1	1	1	1
812	Hazda	0	1	0	1	0	ff	7	1	1	0	1	1	1	1	1	1	1	1	1	1
813	Hazda	0	0	0	1	1	ff	7	1	1	0	1	1	1	1	1	1	1	1	1	1
814	Hazda	0	0	0	1	1	ff	7	1	1	0	1	1	1	1	1	1	1	1	1	1
815	Hazda	0	0	0	0	0	ff	7	0	0	0	0	0	0	0	0	0	0	0	0	0
816	Hazda	0.03125	0	0	0	0	ff	7	0	0	0	0	0	0	0	0	0	0	0	0	0
817	Hazda	0	0	0	0	0	ff	7	0	0	0	0	0	0	0	0	0	0	0	0	0
819	Hazda	0.03125	0	0	0	0	ff	7	0	0	0	0	0	0	0	0	0	0	0	0	0
820	Hazda	0	0	1	0	0	ff	7	0	0	0	0	0	0	0	0	0	0	0	0	0
821	Hazda	0.0625	0	0	0	0	ff	7	0	0	0	0	0	0	0	0	0	0	0	0	0
822	Hazda	0	0	0	0	0	ff	7	0	0	0	0	0	0	0	0	0	0	0	0	0
823	Hazda	0	0	1	1	0	mm	7	1	1	0	1	0	1	1	1	0	1	1	1	1
824	Hazda	0	0	0	1	1	mm	7	1	1	0	1	0	0	1	1	1	1	1	1	1
825	Hazda	0	0	1	0	0	mm	7	1	1	1	1	0	0	0	0	1	0	1	1	1
826	Hazda	0	0	1	1	0	mm	7	1	1	1	1	1	1	1	1	1	1	1	1	1
827	Hazda	0	0	0	0	0	mm	7	1	1	0	1	0	0	0	0	0	0	0	1	0
828	Hazda	0	0	0	0	0	mm	7	0	0	0	0	0	0	0	0	0	0	0	0	0
829	Hazda	0	0	0	0	0	mm	7	1	1	0	1	0	0	0	1	0	0	0	1	0
830	Hazda	0	0	0	0	0	mm	7	1	1	1	1	0	0	1	1	1	1	0	1	1
831	Hazda	0.03125	0	0	1	0	mm	7	1	1	0	1	0	1	1	1	0	1	1	1	1
832	Hazda	0	0	0	0	0	mm	7	0	0	0	0	0	0	0	0	0	0	0	0	0
833	Hazda	0	0	1	0	0	mm	7	1	1	1	1	0	0	1	1	1	0	1	1	1
834	Hazda	0	0	0	1	0	mm	7	1	1	1	0	0	1	1	1	1	1	1	1	0
835	Hazda	0	0	1	1	1	ff	7	1	1	1	0	0	0	1	0	0	1	1	1	1
836	Hazda	0	0	0	0	0	ff	7	0	0	0	0	0	0	0	0	0	0	0	0	0
837	Hazda	0	0	0	0	0	ff	7	0	0	0	0	0	0	0	0	0	0	0	0	0
838	Hazda	0	0	0	1	0	ff	7	1	0	0	0	0	0	0	1	0	0	0	0	0
839	Hazda	0	0	0	0	0	ff	7	0	0	0	0	0	0	0	0	0	0	0	0	0
840	Hazda	0	0	0	0	0	ff	7	0	0	0	0	0	0	0	0	0	0	0	0	0
841	Hazda	0	0	0	0	0	ff	7	0	0	0	0	0	0	0	0	0	0	0	0	0
842	Hazda	0	0	0	0	0	ff	7	0	0	0	0	0	0	0	0	0	0	0	0	0
843	Hazda	0	0	0	0	0	ff	7	0	0	0	0	0	0	0	0	0	0	0	0	0
844	Hazda	0	0	1	0	0	ff	7	0	0	0	0	0	0	0	0	0	0	0	0	0
845	Hazda	0	0	0	0	0	ff	7	0	0	0	0	0	0	0	0	0	0	0	0	0
846	Hazda	0	0	0	0	0	ff	7	0	0	0	0	0	0	0	0	0	0	0	0	0
847	Hazda	0	0	1	1	0	ff	7	1	1	1	0	0	0	0	1	1	1	0	1	1
848	Hazda	0.125	0	0	1	1	ff	7	1	1	0	1	0	1	0	1	0	1	1	1	1
849	Hazda	0	0	0	1	1	ff	7	1	1	1	1	0	0	0	1	0	1	1	1	1
850	Hazda	0	0	1	0	0	ff	7	0	0	0	0	0	0	0	0	0	0	0	0	0
851	Hazda	0	0	0	0	0	ff	7	0	0	0	0	0	0	0	0	0	0	0	0	0
852	Hazda	0	0	0	0	0	ff	7	0	0	0	0	0	0	0	0	0	0	0	0	0
853	Hazda	0	0	0	0	0	ff	7	0	0	0	0	0	0	0	0	0	0	0	0	0
854	Hazda	0	0	0	0	0	ff	7	0	0	0	0	0	0	0	0	0	0	0	0	0
855	Hazda	0	0	0	0	0	ff	7	0	0	0	0	0	0	0	0	0	0	0	0	0
856	Hazda	0	0	0	0	0	ff	7	0	0	0	0	0	0	0	0	0	0	0	0	0
857	Hazda	0	0	0	1	0	ff	7	1	1	1	1	0	1	0	1	1	1	1	1	1
858	Hazda	0	0	0	0	0	ff	7	0	0	0	0	0	0	0	0	0	0	0	0	0
859	Hazda	0	0	0	0	0	mm	7	1	1	0	0	0	0	1	1	0	0	0	0	0
860	Hazda	0	0	1	0	0	mm	7	0	0	0	0	0	0	0	0	0	0	0	0	1
861	Hazda	0.015625	1	0	1	0	mm	7	1	1	0	0	0	0	1	0	0	0	0	1	0
862	Hazda	0	1	0	1	0	mm	7	1	1	0	1	0	1	1	1	1	1	0	1	1
863	Hazda	0	0	0	0	0	mm	7	0	0	0	0	0	0	0	0	0	0	0	0	0
864	Hazda	0.03125	0	0	0	0	mm	7	0	0	0	0	0	0	0	0	0	0	0	0	0
865	Hazda	0.0009766	0	0	0	0	mm	7	0	0	0	0	0	0	0	0	0	0	0	0	0
866	Hazda	0	0	0	0	0	mm	7	0	0	0	0	0	0	0	0	0	0	0	0	0
867	Hazda	0.0019531	0	1	0	0	mm	7	0	0	0	0	0	0	0	0	0	0	0	0	0
868	Hazda	0.03125	0	0	0	0	mm	7	0	0	0	0	0	0	0	0	0	0	0	0	0
869	Hazda	0	0	0	0	0	mm	7	0	0	0	0	0	0	0	0	0	0	0	0	0
870	Hazda	0	0	0	0	0	mm	7	0	0	0	0	0	0	0	0	0	0	0	0	0
871	Hazda	0	0	0	0	0	mm	7	0	0	0	0	0	0	0	0	0	0	0	0	0
872	Hazda	0	0	0	0	0	mm	7	0	0	0	0	0	0	0	0	0	0	0	0	0
873	Hazda	0	0	0	1	0	mm	7	1	1	0	1	1	1	1	1	1	1	0	1	1
874	Hazda	0	0	1	0	1	mm	7	1	1	1	1	0	1	1	1	0	0	0	1	0
875	Hazda	0	0	0	0	0	mm	7	0	0	0	0	0	0	0	0	0	0	0	0	0
876	Hazda	0	0	0	0	0	mm	7	0	0	0	0	0	0	0	0	0	0	0	0	0
877	Hazda	0	0	0	0	0	mm	7	0	0	0	0	0	0	0	0	0	0	0	0	0
878	Hazda	0	0	0	0	0	mm	7	0	0	0	0	0	0	0	0	0	0	0	0	0
879	Hazda	0	0	0	0	0	mm	7	0	0	0	0	0	0	0	0	0	0	0	0	0
880	Hazda	0	0	0	0	0	mm	7	0	0	0	0	0	0	0	0	0	0	0	0	0
881	Hazda	0	0	0	0	0	mm	7	1	1	0	1	0	0	1	1	1	0	0	0	1
882	Hazda	0	0	0	0	0	mm	7	0	0	0	0	0	0	0	0	0	0	0	0	0
883	Hazda	0	0	0	1	0	ff	7	1	1	1	1	1	0	1	1	1	1	0	1	1
884	Hazda	0	0	0	1	1	ff	7	1	1	1	1	0	0	0	1	0	0	0	0	0
885	Hazda	0	0	0	0	0	ff	7	0	0	0	0	0	0	0	0	0	0	0	0	1
886	Hazda	0	0	0	0	0	ff	7	0	0	0	0	0	0	0	0	0	0	0	0	1
887	Hazda	0	0	0	0	0	ff	7	0	1	0	0	0	0	0	0	0	0	0	0	0
888	Hazda	0	0	0	0	0	ff	7	0	0	0	0	0	0	0	0	0	0	0	0	0
889	Hazda	0	0	0	1	0	ff	7	1	1	1	1	1	0	1	1	1	1	0	1	1
890	Hazda	0	0	0	0	0	ff	7	0	0	0	0	0	0	0	0	0	0	0	0	0
891	Hazda	0	0	0	0	0	ff	7	0	0	0	0	0	0	0	0	0	0	0	0	0
892	Hazda	0	0	0	0	0	ff	7	0	0	0	0	0	0	0	0	0	0	0	0	0
893	Hazda	0.0625	0	0	0	0	ff	7	0	1	0	0	0	0	0	0	0	0	0	0	0
894	Hazda	0.0097656	0	0	0	0	ff	7	0	0	0	0	0	0	0	0	0	0	0	0	0
1	Ache	0	0	1	0	0	mm	1	0	1	0	0	0	0	1	1	0	0	0	0	1
2	Ache	0	0	1	0	0	mm	19	1	1	1	1	0	1	1	1	1	1	1	1	1
3	Ache	0	0	0	0	0	mm	9	1	1	1	1	0	0	1	1	1	1	1	1	1
4	Ache	0.125	1	0	0	0	mm	17	1	1	0	0	0	0	1	1	1	0	1	1
5	Ache	0	0	0	0	0	mm	4	1	1	1	1	0	0	1	1	1	1	1	1	1
6	Ache	0	0	0	0	0	mm	5	1	1	0	0	0	0	1	1	1	1	1	1	1
7	Ache	0	0	0	0	0	mm	4	0	1	1	0	0	0	1	1	1	1	1	0	1
8	Ache	0	0	0	0	0	ff	11	1	1	0	0	0	0	1	1	0	0	0	0	1
9	Ache	0	0	0	0	0	ff	10	1	1	0	1	1	0	1	1	1	0	1	0	1
10	Ache	0	0	1	0	0	mm	9	1	1	0	1	0	0	1	1	0	0	1	1
11	Ache	0	0	0	0	0	mm	9	1	1	1	1	1	0	1	1	1	1	1	1
12	Ache	0	0	1	0	0	mm	3	1	1	1	0	0	0	1	1	1	1	1	1	1
13	Ache	0.25	1	0	0	0	mm	9	1	1	1	0	0	0	1	1	0	1	1	0	1
14	Ache	0.0625	0	0	0	1	mm	19	1	1	1	0	0	0	1	0	0	0	0	0
15	Ache	0	0	1	0	0	mm	19	0	1	1	0	0	0	1	1	0	0	1	0	1
16	Ache	0.078125	0	0	0	0	mm	19	1	1	1	0	0	0	1	1	0	1	0	0	1
17	Ache	0.25	1	0	0	1	ff	11	1	1	1	0	0	0	1	1	0	0	0	0
18	Ache	0	0	1	0	0	mm	19	1	1	1	0	0	0	1	1	0	1	0	0	1
19	Ache	0	0	0	0	0	mm	17	1	1	1	0	0	0	1	1	0	0	1	1
20	Ache	0	0	0	0	0	mm	22	1	1	0	0	0	0	1	1	0	1	0	0
21	Ache	0.0625	0	0	0	1	mm	9	1	1	1	0	0	0	1	1	1	1	1	1	1
22	Ache	0	0	1	0	0	ff	12	1	1	1	0	0	0	1	1	0	0	1	0	1
23	Ache	0	0	0	0	0	ff	1	0	0	0	0	0	0	0	0		0	0	0	0
24	Ache	0	0	0	0	0	mm	13	1	1	1	1	0	0	1	1	1	1	1	0
25	Ache	0	0	0	0	0	mm	8	1	1	1	1	0	0	1	1	1	1	1	1
26	Ache	0.0390625	0	0	0	0	mm	8	1	1	1	1	1	1	1	1	1	1	1	1	1
27	Ache	0	0	0	0	0	mm	1	0	0	0	0	0	0	0	0	0	0	0	0	0
28	Ache	0	0	0	0	0	ff	1	0	0	0	0	0	0	0	0	0	0	0	0	0
29	Ache	0	0	0	0	1	mm	11	1	1	1	0	0	0	1	1	1	1	0	0	1
30	Ache	0	0	0	0	0	mm	9	1	1	1	0	0	0	1	1	0	1	1	1	1
31	Ache	0	0	0	0	1	mm	8	1	1	1	1	1	0	1	1	1	1	1	1
32	Ache	0	0	0	0	0	mm	19	1	1	1	0	0	0	0	1	0	0	1	0	1
33	Ache	0	0	1	0	0	mm	9	0	1	1	1	1	0	1	1	0	0	0	0
34	Ache	0.0625	0	0	0	0	mm	19	1	1	1	1	0	0	1	0	0	0	1	0	1
35	Ache	0	0	0	0	0	mm	13	1	1	1	0	0	0	1	1	0	1	1	0	1
36	Ache	0	0	1	0	0	mm	9	1	1	1	0	0	0	1	1	1	1	1	0	1
37	Ache	0	0	0	0	0	mm	8	1	1	1	1	1	0	1	1	0	1	1	0
38	Ache	0.03125	0	0	0	1	mm	11	1	1	1	0	0	1	1	1	1	1	1	1	1
39	Ache	0	0	0	0	0	ff	7	1	1	1	0	0	0	1	1	0	0	1	1
40	Ache	0	0	0	0	0	mm	8	1	1	1	1	1	0	1	1	1	1	1	1
41	Ache	0	0	0	0	0	mm	2	0	0	0	0	0	0	0	0	0	0	0	0	0
42	Ache	0	0	0	0	0	ff	10	1	1	1	0	0	0	1	1	0	0	1	0	1
43	Ache	0	0	0	0	0	mm	21	1	1	1	1	0	1	1	1	0	1	0	1	1
44	Ache	0	0	0	0	0	mm	9	1	1	1	1	1	1	1	1	1	1	1	1
45	Ache	0	0	0	0	0	ff	10	1	1	1	1	1	0	1	1	1	0	1	0	1
46	Ache	0	0	0	0	0	ff	11	1	1	1	0	1	1	1	1	0	0	1	0	1
47	Ache	0	0	0	0	0	mm	9	1	1	1	0	0	0	0	1	0	0	0	0	1
48	Ache	0	0	0	0	0	mm	8	1	1	1	1	1	0	1	1	1	1	1	1
49	Ache	0	0	0	0	0	mm	13	1	1	1	1	0	0	1	1	1	1	1	0
50	Ache	0	0	1	0	0	mm	7	1	1	1	0	0	0	1	1	1	1	0	1	1
51	Ache	0	0	0	0	0	mm	13	1	1	0	0	0	0	1	1	1	0	0	1	0
52	Ache	0	0	0	0	0	mm	11	1	1	0	0	0	0	1	1	1	1	1	1	1
53	Ache	0	0	0	0	0	mm	9	1	1	1	0	0	0	1	1	1	1	1	1	1
54	Ache	0	0	0	0	0	mm	13	1	1	1	1	0	0	1	1	1	1	1	1
55	Ache	0	0	1	0	0	ff	1	0	0	0	0	0	0	0	0	0	0	0	0	0
56	Ache	0	0	0	0	0	mm	3	1	1	1	1	0	1	1	1	1	1	1	1	1
57	Ache	0	0	0	0	0	mm	1	1	1	1	0	1	0	1	1	0	1	1	0	1
58	Ache	0.015625	0	0	0	0	mm	11	0	1	0	0	0	0	1	1	1	0	0	1	1
59	Ache	0	0	0	0	0	ff	10	1	1	1	1	0	0	0	1	0	0	1	0	1
60	Ache	0.125	1	0	0	1	mm	17	1	1	1	0	0	1	1	1	1	1	0	0	1
61	Ache	0	0	0	0	1	mm	17	1	1	1	0	1	0	1	1	1	1	1	1
62	Ache	0	0	0	0	0	ff	11	1	1	1	0	0	0	1	1	1	0	1	0	1
63	Ache	0	0	0	0	0	mm	7	0	0	0	0	0	0	0	0	0	0	0	0	0
64	Ache	0.0625	0	0	0	0	mm	19	1	1	1	0	0	0	1	1	0	1	0	1	1
65	Ache	0	0	0	0	0	mm	9	1	1	1	0	0	0	1	1	1	1	1	0	1
66	Ache	0	0	1	0	0	mm	17	1	1	1	1	0	0	1	1	1	1	1	1	1
67	Ache	0	0	0	0	1	mm	17	1	1	1	0	0	1	1	1	1	1	0	0	1
68	Ache	0	0	0	0	1	mm	17	1	1	1	0	0	0	0	0	0	0	0	1	0
69	Ache	0	0	0	0	0	ff	13	1	1	1	0	0	0	1	1	0	0	1	1	1
70	Ache	0.015625	0	1	0	1	mm	19	1	1	1	1	0	0	1	1	0	1	1	0
71	Ache	0	0	0	0	0	ff	10	1	1	0	1	0	0	1	1	1	0	1	0	1
72	Ache	0	0	0	0	0	ff	10	1	1	1	1	1	0	1	1	1	0	1	0	1
73	Ache	0	0	0	0	1	mm	9	0	1	0	0	0	0	1	1	0	1	0	1
74	Ache	0	0	0	0	0	mm	9	0	0	0	0	0	0	0	0	0	0	0	0	0
75	Ache	0	0	0	0	0	mm	8	1	1	1	0	0	1	1	1	1	1	1	1
76	Ache	0	0	1	0	0	mm	2	1	1	1	0	0	0	0	1	0	0	0	0
77	Ache	0.125	1	0	0	0	ff	10	1	1	1	0	0	0	1	1	0	0	1	1	1
78	Ache	0	0	0	0	0	mm	11	1	1	1	0	0	0	1	1	1	1	0	0	1
79	Ache	0	0	0	0	0	ff	10	1	1	1	1	0	0	1	1	1	0	1	0	1
80	Ache	0	0	0	0	0	mm	5	1	1	1	0	0	0	1	1	0	1	1	1	1
81	Ache	0	0	0	0	1	mm	17	0	1	0	0	0	0	1	1	0	0	0	0	1
82	Ache	0	0	0	0	1	mm	11	1	1	0	0	0	0	1	1	1	0	1	0	1
83	Ache	0	0	0	0	0	mm	17	1	1	0	0	0	0	1	1	1	0	1	1
84	Ache	0.078125	0	0	0	0	mm	13	1	1	1	0	0	0	1	1	0	1	1	0	1
85	Ache	0	0	1	0	0	ff	12	1	1	1	0	1	1	1	1	1	0	0	0	0
86	Ache	0	0	0	0	0	ff	12	1	1	0	0	0	0	1	1	0	0	1	0
87	Ache	0	0	0	0	0	mm	15	1	1	1	0	0	0	1	1	1	1	1	0	1
88	Ache	0.0625	0	0	0	0	ff	9	0	1	1	0	0	0	0	0	0	0	1	0	1
89	Ache	0.0625	0	0	0	0	ff	11	0	1	1	0	1	0	1	1	1	0	1	1	1
90	Ache	0.125	1	0	0	0	ff	8	1	1	0	0	0	0	0	0	0	0	0	0
91	Ache	0.015625	0	0	0	0	ff	10	1	1	1	0	1	0	1	1	0	1	1	0	1
92	Ache	0	0	0	0	0	ff	12	1	1	1	0	0	0	1	1	1	0	0	0	1
93	Ache	0	0	0	0	1	mm	17	1	1	1	0	0	0	1	1	1	0	0	0	1
94	Ache	0	0	1	0	0	ff	12	1	1	1	0	0	0	1	1	1	0	1	0	1
95	Ache	0	0	0	0	1	mm	8	0	1	0	0	0	0	1	1	0	0	1	0
96	Ache	0.125	1	0	0	0	mm	9	1	1	1	1	0	1	1	1	1	1	1	1	1
97	Ache	0	0	0	0	0	ff	12	1	1	0	1	0	1	1	1	0	0	1	1	1
98	Ache	0	0	0	0	0	ff	10	1	1	0	1	0	0	1	1	0	0	1	0	1
99	Ache	0.125	1	0	0	0	mm	9	0	0	0	0	0	0	0	0	0	0	0	0
100	Ache	0	0	0	0	0	ff	10	1	1	1	1	1	0	1	1	1	0	1	0	1
101	Ache	0	0	0	0	0	ff	11	1	1	0	0	0	0	1	1	1	0	1	0	1
102	Ache	0	0	0	0	0	mm	8	1	1	1	1	1	0	1	1	1	1	1	1
103	Ache	0	0	0	0	0	mm	9	1	1	1	0	0	1	1	1	0	1	1	1	1
104	Ache	0	0	0	0	1	mm	17	1	1	1	0	0	0	1	1	0	0	0	0	1
105	Ache	0	0	0	0	0	ff	12	1	1	1	1	0	0	1	1	0	0	1	0	1
106	Ache	0	0	0	0	0	ff	10	1	1	1	1	1	0	1	1	0	0	1	0	1
107	Ache	0	0	0	0	0	ff	11	1	1	0	0	0	0	1	1	0	0	1	0	1
108	Ache	0	0	0	0	0	mm	17	1	1	0	0	0	0	1	1	1	1	1	0
109	Ache	0	0	0	0	0	ff	12	1	1	0	1	0	1	1	1	0	0	1	0	1
110	Ache	0.03125	0	0	0	0	mm	3	1	1	1	1	0	1	1	1	1	1	1	1	1
111	Ache	0	0	1	0	0	mm	19	1	1	1	0	0	0	1	1	0	1	1	0	1
112	Ache	0	0	0	0	0	mm	9	1	1	0	0	0	1	1	1	0	1	1	0	1
113	Ache	0.140625	1	1	0	0	ff	10	1	1	1	0	1	0	1	1	0	0	1	0	0
114	Ache	0	0	0	0	0	mm	17	1	1	1	0	1	0	1	1	0	1	1	0	1
115	Ache	0	0	1	0	0	mm	9	1	1	1	1	0	1	1	1	1	1	1	1	1
116	Ache	0	0	0	0	0	mm	4	0	1	0	0	0	0	0	0	0	0	0	0
117	Ache	0	0	0	0	0	ff	1	0	0	0	0	0	0	0	0	0	0	0	0	0
118	Ache	0	0	0	0	0	mm	19	1	1	1	0	0	0	1	1	0	1	1	0
119	Ache	0	0	0	0	0	ff	12	1	1	1	0	0	0	1	1	1	0	1	0	1
120	Ache	0	0	1	0	0	ff	12	1	1	1	0	0	0	1	1	0	0	1	0	1
121	Ache	0	0	0	0	0	ff	12	1	1	1	0	0	0	1	1	0	0	0	0	1
122	Ache	0	0	0	0	0	mm	2	1	1	0	1	0	0	1	1	1	1	0	0
123	Ache	0	0	1	0	1	mm	7	0	1	0	0	0	0	1	1	1	1	0	0	1
124	Ache	0.25	1	0	0	0	mm	7	1	1	0	0	0	0	1	1	1	1	0	0
125	Ache	0.0625	0	0	0	0	mm	15	1	0	0	0	0	0	1	0	0	1	0	0	1
126	Ache	0.03125	0	0	0	0	mm	4	1	1	1	0	0	0	1	1	0	0	1	1
127	Ache	0	0	0	0	0	mm	5	1	1	1	1	1	1	1	1	1	1	1	1
128	Ache	0.03125	0	0	0	0	mm	14	1	1	1	0	0	1	1	1	0	1	1	0	1
129	Ache	0	0	0	0	0	mm	3	1	1	1	1	0	0	1	1	1	1	1	0	1
130	Ache	0	0	0	0	0	mm	3	1	1	1	1	1	1	1	1	1	1	1	1	1
131	Ache	0	0	1	0	0	mm	8	1	1	1	1	1	1	1	1	1	1	1	1	1
132	Ache	0	0	1	0	0	mm	9	1	1	1	0	0	0	1	1	1	1	1	1	1
133	Ache	0	0	1	0	0	mm	3	1	1	1	0	0	0	1	1	0	1	1	0	1
134	Ache	0	0	0	0	0	mm	21	1	1	0	0	0	1	1	1	1	0	0	1
135	Ache	0	0	0	0	0	mm	17	1	1	1	0	0	0	1	1	1	1	0	0	1
136	Ache	0	0	0	0	0	ff	10	1	1	1	1	1	0	1	1	1	0	1	0	1
137	Ache	0	0	0	0	0	mm	6	0	1	0	0	0	1	1	1	1	1	1	1	1
138	Ache	0	0	0	0	0	mm	19	1	1	1	0	0	0	1	0	0	1	1	0	1
139	Ache	0.125	1	0	0	0	ff	18	1	1	0	0	0	0	0	0	0	0	0	0
140	Ache	0.03125	0	0	0	1	mm	8	1	1	0	1	0	0	1	0	1	1	1	1
141	Ache	0	0	0	0	0	mm	24	1	1	1	1	0	0	1	1	0	1	1	0	1
142	Ache	0	0	0	0	0	mm	1	0	0	0	0	0	0	0	0	0	0	0	0	0
143	Ache	0	0	0	0	0	mm	7	1	1	1	0	0	0	0	1	0	0	0	1	0
144	Ache	0	0	0	0	0	mm	14	0	1	1	0	0	0	0	0	0	0	0	0	1
145	Ache	0	0	0	0	0	ff	11	1	1	0	0	0	0	1	1	0	0	0	0	1
146	Ache	0.25	1	0	0	1	mm	17	1	1	0	0	0	0	1	1	1	1	1	1	1
147	Ache	0	0	0	0	1	ff	11	0	1	0	0	0	0	0	1	0	0	0	0	0
148	Ache	0	0	0	0	0	ff	9	1	1	1	1	1	0	1	1	0	0	0	0
149	Ache	0	0	1	0	0	mm	14	1	0	1	0	0	0	1	1	0	0	1	0
150	Ache	0	0	1	0	0	ff	12	1	1	1	0	0	0	1	1	0	0	1	0	1
151	Ache	0.25	1	0	0	1	ff	10	1	1	1	1	0	1	1	1	0	0	1	1	1
152	Ache	0	0	0	0	0	mm	8	1	1	1	1	0	0	1	1	1	1	1	1
153	Ache	0	0	0	0	0	mm	5	1	1	1	1	0	0	1	1	1	1	1	1
154	Ache	0	0	0	0	0	mm	21	1	1	1	1	0	0	1	1	1	1	0	1	1
155	Ache	0	0	0	0	0	mm	7	1	1	1	0	0	0	1	1	0	1	1	0	1
156	Ache	0	0	0	0	0	mm	5	0	0	0	0	0	0	0	0	0	0	0	0	0
157	Ache	0	0	1	0	0	mm	7	1	1	1	0	0	0	1	1	0	1	0	1	1
158	Ache	0.125	1	0	0	0	mm	9	1	1	1	0	0	0	1	1	1	1	1	1	1
159	Ache	0	0	0	0	0	mm	9	1	1	1	0	0	0	1	1	1	1	1	1	1
160	Ache	0	0	0	0	0	mm	12	1	0	0	0	0	0	0	0	0	0	0	1
161	Ache	0	0	0	0	0	mm	15	1	1	1	0	0	0	0	0	0	1	0	0	1
162	Ache	0	0	0	0	0	ff	12	1	1	1	0	0	1	1	1	0	0	1	1	1
163	Ache	0.125	1	0	0	0	mm	5	1	1	0	1	0	0	1	1	1	1	1	0	1
164	Ache	0	0	0	0	0	mm	4	1	1	1	1	1	1	1	1	1	1	1	1	1
165	Ache	0	0	0	0	1	mm	15	1	1	1	1	0	1	1	1	1	1	0	1	1
166	Ache	0.125	1	0	0	0	mm	13	1	1	0	0	0	1	1	1	0	1	0	0	1
167	Ache	0	0	0	0	0	mm	9	1	1	1	1	1	0	1	1	1	1	1	1
168	Ache	0	0	0	0	0	mm	17	1	1	1	0	0	0	1	1	1	1	1	1
169	Ache	0.125	1	1	0	0	mm	17	1	1	0	1	0	1	1	1	0	1	0	1	1
170	Ache	0.03125	0	0	0	0	ff	1	0	0	0	0	0	0	0	0	0	0	0	0	0
171	Ache	0	0	0	0	0	mm	12	1	1	1	0	0	0	1	1	0	1	1	1	1
172	Ache	0	0	0	0	0	ff	12	1	1	1	0	0	0	1	1	0	0	1	1	1
173	Ache	0	0	1	0	0	ff	11	1	1	1	0	1	0	1	1	0	0	1	1
174	Ache	0	0	1	0	0	mm	19	1	1	1	0	0	0	0	1	0	1	0	0	1
175	Ache	0	0	0	0	0	mm	9	1	1	1	1	0	1	0	1	1	1	1	1
176	Ache	0	0	0	0	0	mm	17	1	1	1	0	1	0	1	1	1	1	0	1
177	Ache	0	0	0	0	0	mm	12	1	1	1	0	0	0	1	1	1	1	0	1	1
178	Ache	0	0	1	0	0	ff	12	1	1	0	0	1	1	0	0	0	0	0	0	1
179	Ache	0	0	0	0	0	ff	12	1	1	0	0	0	0	1	1	1	0	1	0
180	Ache	0	0	0	0	0	mm	9	0	0	0	0	0	0	0	0	0	0	0	0
181	Ache	0	0	0	0	0	mm	8	1	1	1	1	0	0	1	1	1	1	1	1
182	Ache	0.0390625	0	0	0	1	mm	11	1	1	1	0	0	0	1	1	1	1	1	1	1
183	Ache	0	0	0	0	0	mm	13	1		1	0	0	0	1	1	0	1	1	0	1
184	Ache	0	0	0	0	0	mm	17	1	1	1	1	1	0	1	1	0	1	0	1
185	Ache	0	0	0	0	0	mm	13	1	1	0	1	0	0	1	1	1	1	1	0
186	Ache	0	0	0	0	0	mm	7	0	1	0							0	1
187	Ache	0	0	1	0	1	ff	10	1	1	1	1	0	0	1	1	1	0	1	0	1
188	Ache	0.125	1	0	0	1	mm	17	1	1	1	0	0	0	1	1	1	1	1	1
189	Ache	0	0	0	0	0	mm	4	1	1	1	0	0	0	1	1	0	1	0	0	1
190	Ache	0.25	1	0	0	0	mm	9	1	1	1	1	0	1	1	1	1	1	0	1
191	Ache	0	0	1	0	0	ff	8	0	1	0	0	0	0	0	0	0	0	0	0
192	Ache	0	0	1	0	1	mm	7	1	1	1	0	0	1	1	1	0	1	0	1	1
193	Ache	0	0	0	0	1	mm	4	1	1	0	1	0	0	0	1	1	0	1	0
194	Ache	0	0	0	0	0	mm	2	1	1	0	0	0	0	1	1	1	1	0	1	1
195	Ache	0	0	0	0	0	mm	5	1	1	1	0	0	0	1	1	1	1	1	0	1
196	Ache	0	0	0	0	0	ff	10	1	1	0	1	0	0	1	1	1	0	1	0	1
197	Ache	0	0	0	0	0	ff	8	0	0	0	0	0	0	0	0	0	0	0	0	0
198	Ache	0	0	1	0	0	mm	19	1	1	1	0	0	0	0	0	0	0	0	0	0
199	Ache	0	0	0	0	0	mm	19	1	1	1	0	0	0	1	1	0	1	0	0
200	Ache	0.125	1	0	0	0	mm	16	1	1	1	0	0	0	1	1	0	1	0	0	1
201	Ache	0	0	0	0	0	ff	11	0	1	1	0	1	0	1	1	1	0	1	1	1
202	Ache	0.125	1	0	0	0	mm	13	1	1	1	0	0	0	1	1	0	1	1	0
203	Ache	0	0	0	0	0	mm	19	1	1	1	0	0	0	1	1	0	1	1	0	1
204	Ache	0	0	0	0	0	mm	1	0	1	0	0	0	0	0	0	0	0	1	0	1
205	Ache	0	0	1	0	0	mm	17	1	1	1	1	0	0	1	1	1	1	0	0	1
206	Ache	0	0	0	0	0	ff	10	1	1	0	1	0	0	0	0	1	0	1	0	1
207	Ache	0	0	1	0	0	mm	4	1	1	1	0	0	0	1	1	1	1	1	1	1
208	Ache	0	0	0	0	0	ff	10	1	1	0	1	1	0	1	1	1	0	1	0	1
209	Ache	0	0	0	0	0	mm	3	1	1	0	0	0	0	1	1	0	0	0	1	1
210	Ache	0.0625	0	0	0	0	mm	9	1	1	0	1	0	0	1	1	1	1	1	1
211	Ache	0	0	0	0	0	mm	9	1	1	1	0	0	0	1	1	0	1	1	1	1
212	Ache	0.0625	0	0	0	0	mm	13	1	1	1	0	1	0	1	1	1	1	0	0
213	Ache	0	0	0	0	1	mm	10	1	1	1	0	0	0	1	1	1	1	1	1	1
214	Ache	0.25	1	0	0	0	mm	17	1	1	0	0	0	1	1	1	0	0	0	0	1
215	Ache	0	0	0	0	0	mm	9	1	1	1	0	0	0	1	1	1	1	1	0	1
216	Ache	0.0625	0	1	0	0	ff	12	1	1	1	0	1	1	1	1	0	0	1	1	1
217	Ache	0	0	0	0	0	ff	10	1	1	1	0	0	0	1	1	0	0	1	0	1
218	Ache	0.125	1	0	0	0	ff	12	1	1	1	0	0	0	1	1	1	0	1	1	1
219	Ache	0	0	1	0	0	ff	11	0	1	0	0	0	0	1	1	0	0	1	0	1
220	Ache	0.0625	0	0	0	0	mm	8	1	1	1	1	1	1	1	1	1	1	1	1
221	Ache	0.03125	0	0	0	0	mm	13	1	1	1	1	0	0	1	1	0	1	1	0	1
222	Ache	0	0	0	0	0	mm	9	1	1	1	1	0	1	1	1	0	1	1	1	1
223	Ache	0	0	1	0	0	mm	19	1	1	1	0	0	0	1	1	0	0	1	0	1
224	Ache	0.0625	0	0	0	0	mm	8	1	1	1	1	0	0	0	0	1	1	1	0
225	Ache	0	0	0	0	0	mm	19	1	1	1	0	0	0	1	1	0	1	0	0	1
226	Ache	0	0	1	0	0	mm	9	1	1	1	0	0	1	1	1	1	1	1	1	1
227	Ache	0	0	0	0	0	ff	9	1	0	1	0	0	0	1	1	1	0	1	0
228	Ache	0	0	0	0	0	mm	8	1	1	1	1	1	0	1	1	1	1	1	1
229	Ache	0	0	0	0	0	ff	9	1	1	0	0	0	0	1	1	0	0	1	0	1
230	Ache	0	0	0	0	0	mm	19	1	1	1	0	0	0	1	1	0	1	1	1
231	Ache	0	0	0	0	0	mm	11	1	1	1	0	0	0	1	1	1	1	1	1	1
232	Ache	0.125	1	0	0	0	mm	9	1	1	1	1	0	0	1	1	1	1	1	1	1
233	Ache	0.0625	0	0	0	0	mm	8	1	1	1	0	0	0	1	1	0	1	1	0	1
234	Ache	0	0	0	0	0	mm	4	1	1	1	1	0	0	1	1	1	0	1	1	1
235	Ache	0	0	0	0	0	mm	9	1	1	1	1	1	1	1	1	1	1	1	1
236	Ache	0	0	0	0	0	mm	8	1	1	1	1	1	0	1	1	1	1	1	1
237	Ache	0	0	0	0	0	ff	3	1	0	0	0	0	0	1	1	1	0	0	0
238	Ache	0	0	0	0	0	ff	11	0	1	0	0	0	0	1	1	1	0	1	0	1
239	Ache	0	0	1	0	0	mm	13	1	1	1	0	0	0	0	0	0	0	0	0	1
240	Ache	0.03125	0	0	0	0	mm	9	1	1	1	0	0	0	1	1	0	1	1	0	1
241	Ache	0	0	1	0	0	mm	20	1	1	1	1	1	0	1	1	1	1	1	1	1
242	Ache	0	0	1	0	0	mm	9	1	1	1	1	0	1	1	1	1	1	1	1	1
243	Ache	0	0	0	0	0	mm	22	1	1	1	1	0	0	1	1	1	1	1	1
244	Ache	0	0	0	0	0	mm	19	1	1	1	0	0	0	1	1	0	1	1	0	1
245	Ache	0	0	0	0	0	mm	11	1	1	0	0	0	0	1	0	0	0	1	0	1
246	Ache	0.078125	0	0	0	0	mm	2	0	0	0	0	0	0	0	0	0	0	0	0	0
247	Ache	0	0	0	0	0	mm	9	1	1	0	0	0	0	1	1	0	0	0	0	1
248	Ache	0	0	1	0	0	mm	9	1	1	1	1	0	1	1	1	1	1	1	1	1
249	Ache	0	0	0	0	0	ff	10	1	1	1	1	0	0	1	1	1	0	1	0	1
250	Ache	0	0	0	0	0	mm	13	0	0	0	0	0	0	1	1	0	0	0	0	1
251	Ache	0	0	0	0	0	ff	18	1	1	1	0	0	0	1	1	1	0	1	0	1
252	Ache	0	0	0	0	0	ff	11	1	1	0	0	0	0	1	1	1	0	1	0	1
253	Ache	0	0	0	0	0	mm	8	1	1	1	1	0	0	1	1	1	1	1	1
254	Ache	0	0	0	0	0	mm	11	0	1	0	0	0	0	1	1	1	0	0	0	0
255	Ache	0.0625	0	0	0	0	mm	21	1	1	1	0	1	0	1	1	1	1	0	0
256	Ache	0.015625	0	0	0	0	mm	9	1	1	1	1	0	0	1	1	1	1	1	1	1
257	Ache	0	0	0	0	1	mm	24	1	1	1	1	0	1	1	1	0	1	1	1	1
258	Ache	0	0	0	0	0	mm	3	1	1	1	0	1	0	1	1	0	1	1	0	1
259	Ache	0	0	0	0	0	mm	18	1	1	1	0	0	0	0	0	0	1	0	0	1
260	Ache	0	0	0	0	0	mm	9	1	1	1	0	0	0	1	1	0	1	1	0	1
261	Ache	0	0	0	0	0	mm	13	1	1	0	1	1	0	1	1	1	1	1	1	1
262	Ache	0	0	0	0	0	mm	17	1	1	1	0	0	0	0	0	0	0	0	0	0
263	Ache	0.015625	0	1	0	0	mm	14	1	1	1	0	0	0	1	1	0	0	0	0	1
264	Ache	0	0	0	0	0	mm	13	1	1	1	0	1	0	1	1	1	1	0	0
265	Ache	0.125	1	0	0	0	mm	5	1	1	1	0	0	0	1	1	0	0	1	0
266	Ache	0	0	1	0	0	mm	15	1	1	1	1	1	1	1	1	1	1	1	1
267	Ache	0	0	0	0	0	ff	10	1	1	1	1	0	0	0	1	0	0	1	0	1
268	Ache	0	0	0	0	0	mm	8	1	1	1	1	0	1	1	1	1	1	1	1
269	Ache	0	0	0	0	0	mm	16	1	1	1	1	1	0	1	1	1	1	1	1	1
270	Ache	0	0	0	0	0	ff	11	0	1	0	0	0	0	1	1	1	0	0	0	0
271	Ache	0	0	0	0	1	mm	13	1	1	1	0	0	0	1	1	1	1	1	1	1
272	Ache	0	0	0	0	0	ff	12	1	1	1	0	0	0	1	1	1	0	1	0	1
273	Ache	0.03125	0	0	0	1	mm	9	1	1	1	1	0	0	1	1	0	1	1	1	1
274	Ache	0	0	0	0	1	ff	11	0	1	0	0	0	0	1	1	0	0	1	0	1
275	Ache	0	0	0	0	0	mm	19	1	1	1	0	0	0	1	1	0	1	1	0	1
276	Ache	0	0	0	0	0	ff	10	1	1	0	1	0	0	0	0	1	0	1	0	1
277	Ache	0.03125	0	1	0	1	mm	17	1	1	1	0	0	1	1	1	1	1	1	1	1
278	Ache	0	0	0	0	1	ff	3	0	0	0	0	1	0	1	1	1	0	0	0
279	Ache	0	0	0	0	0	mm	9	1	1	1	1	0	1	1	1	1	1	1	1	1
280	Ache	0	0	0	0	0	mm	2	1	1	1	1	1	1	1	1	1	1	1	0	1
281	Ache	0.03125	0	0	1	0	mm	21	1	1	0	1	1	0	1	1	1	1	1	1
282	Ache	0	0	1	1	1	ff	11	1	1	0	1	0	0	1	1	1	0	1	0	1
283	Ache	0	0	1	1	0	mm	19	1	1	1	0	0	0	1	1	0	1	0	0	1
284	Ache	0	0	1	1	0	mm	16	1	1	1	0	0	1	1	1	0	1	1	1	1
285	Ache	0	0	1	1	1	mm	9	1	1	1	1	0	0	1	1	1	1	1	1
286	Ache	0	0	0	1	0	mm	17	1	1	1	1	0	1	1	1	1	1	1	1	1
287	Ache	0.046875	0	0	1	0	mm	15	1	1	1	0	1	0	1	1	0	1	1	0
288	Ache	0.5	1	0	1	1	mm	8	1	1	0	1	0	0	1	1	0	1	1	1
289	Ache	0	0	0	1	0	mm	18	1	1	1	1	0	0	1	1	1	1	1	1
290	Ache	0	0	0	1	0	mm	17	1	1	0	0	0	0	1	1	1	0	0	0	1
291	Ache	0	0	0	1	0	mm	17	1	1	1	0	1	0	1	1	1	1	1	1
292	Ache	0	0	1	1	1	mm	20	1	1	1	1	1	1	1	1	1	1	1	1	1
293	Ache	0	0	1	1	1	mm	16	1	1	1	1	1	1	1	1	1	1	1	1	1
294	Ache	0	0	1	1	1	mm	17	1	1	1	1	1	1	1	1	1	1	0	0	1
295	Ache	0.5	1	0	1	1	ff	10	1	1	1	0	1	0	1	1	1	0	1	0
296	Ache	0	0	0	1	1	ff	10	1	1	1	1	1	0	1	1	0	0	1	0	1
297	Ache	0	0	1	1	0	mm	15	1	1	1	0	0	0	1	1	0	1	1	0	1
298	Ache	0	0	0	1	0	ff	2	1	1	1	1	1	1	1	1	1	0	0	1	1
299	Ache	0.0625	0	0	1	0	mm	8	1	1	1	1	1	0	1	1	1	1	1	1
300	Ache	0	0	0	1	0	mm	8	1	1	0	1	0	0	1	1	1	1	1	1
301	Ache	0.25	1	0	1	1	mm	9	1	1	1	1	0	1	1	1	1	1	0	1	1
302	Ache	0.0625	0	0	1	0	mm	12	1	1	1	0	1	0	1	1	1	1	0	1
303	Ache	0.0625	0	0	1	1	mm	8	0	1	0	0	0	0	1	1	1	1	1	0
304	Ache	0	0	0	1	0	ff	12	1	1	0	0	0	0	1	1	1	0	1	0
305	Ache	0	0	0	1	0	ff	10	1	1	1	1	1	0	1	1	1	0	1	0	1
306	Ache	0	0	0	1	0	mm	14	1	1	1	1	1	0	1	1	1	1	1	0	1
307	Ache	0	0	0	1	0	mm	21	1	1	1	0	0	1	1	1	1	1	1	1	1
308	Ache	0	0	1	1	0	mm	8	1	1	0	0	0	0	1	1	1	0	1	0	1
309	Ache	0.5	1	0	1	1	mm	14	1	1	1	1	1	1	1	1	1	1	1	1	1
310	Ache	0	0	0	1	0	mm	9	1	1	1	1	0	0	1	1	0	1	1	1	1
311	Ache	0.015625	0	0	1	1	ff	11	1	1	1	0	0	1	1	1	1	0	1	1	1
312	Ache	0	0	1	1	1	mm	17	1	1	1	1	0	1	1	1	1	1	1	0	1
313	Ache	0	0	0	1	0	mm	9	1	1	1	1	0	1	1	1	1	1	1	1	1
314	Ache	0	0	1	1	1	mm	19	1	1	1	0	0	0	1	1	0	1	0	0
315	Ache	0	0	0	1	1	ff	11	1	1	1	0	0	1	1	1	1	0	1	1	1
316	Ache	0	0	1	1	0	ff	8	1	0	1	0	0	0	0	0	0	0	0	0
317	Ache	0	0	0	1	0	ff	12	1	1	1	1	0	1	1	1	0	0	1	0	1
318	Ache	0	0	0	1	0	mm	9	1	1	1	1	0	1	1	1	0	1	1	1	1
319	Ache	0.015625	0	0	1	1	ff	11	1	1	0	0	0	0	1	1	1	0	1	1	1
320	Ache	0.0390625	0	0	1	1	mm	17	0	1	0	0	0	0	1	1	1	1	1	0	1
321	Ache	0	0	0	1	0	mm	12	1	1	1	0	0	1	1	1	0	1	0	1	1
322	Ache	0	0	0	1	0	mm	9	1	1	1	1	1	1	1	1	1	1	1	1
323	Ache	0	0	0	1	1	mm	7	1	1	1	1	1	1	1	1	1	1	1	1	1
324	Ache	0	0	0	1	1	ff	3	1	1	0	0	0	0	1	1	1	0	0	1
325	Ache	0	0	0	1	0	mm	9	1	1	1	1	0	1	1	1	1	1	1	1
326	Ache	0	0	1	1	0	mm	17	1	1	1	0	0	0	1	1	0	1	1	0	1
327	Ache	0.0234375	0	1	1	1	ff	11	1	1	1	1	1	0	1	1	0	0	1	1
328	Ache	0	0	0	1	0	mm	16	1	1	1	1	0	1	1	1	1	1	1	1	1
329	Ache	0	0	0	1	0	mm	11	1	1	1	0	0	0	1	1	0	1	0	1	1
330	Ache	0	0	0	1	0	ff	12	1	1	0	1	0	1	1	1	0	0	1	0	1
331	Ache	0	0	0	1	1	mm	8	1	1	1	1	1	1	1	1	1	1	1	1	1
332	Ache	0	0	1	1	1	ff	11	1	1	0	0	0	0	1	1	1	0	0	0
333	Ache	0	0	0	1	0	mm	7	1	1	1	1	0	0	1	1	1	1	1	0
334	Ache	0	0	0	1	0	mm	22	1	1	0	0	0	0	1	1	0	1	1	1
335	Ache	0	0	1	1	0	mm	15	1	1	1	1	0	1	1	1	1	1	1	1	1
336	Ache	0	0	0	1	0	ff	1	0	0	0	0	0	0	0	0	0	0	0	0	0
337	Ache	0	0	0	1	1	mm	17	1	1	1	0	1	0	1	1	1	1	1	0
338	Ache	0	0	0	1	1	mm	17	1	1	1	0	1	0	1	1	1	1	0	0
339	Ache	0.5	1	0	1	0	ff	12	1	1	1	1	1	0	1	1	1	0	1	0
340	Ache	0	0	1	1	0	ff	11	1	1	1	0	1	0	1	1	0	0	1	0	1
341	Ache	0.0859375	0	1	1	0	mm	17	1	1	1	0	0	0	1	1	0	1	1	1	1
342	Ache	0.078125	0	1	1	1	mm	9	1	1	0	0	0	1	1	1	1	0	1	1	1
343	Ache	0.078125	0	1	1	1	mm	9	1	1	1	1	0	0	1	1	1	1	1	1
344	Ache	0	0	0	1	0	ff	10	1	1	1	1	1	0	1	1	1	0	1	0	1
345	Ache	0	0	1	1	1	mm	7	1	1	0	0	1	0	1	1	1	1	1	1
346	Ache	0.25	1	0	1	1	ff	18	1	1	1	1	1	0	1	1	1	0	1	1
347	Ache	0.03125	0	0	1	1	mm	17	1	1	0	0	0	0	1	1	1	0	0	1	1
348	Ache	0	0	0	1	0	mm	13	1	1	1	0	0	1	1	1	0	1	1	0	1
349	Ache	0.5	1	0	1	0	ff	12	1	1	1	1	1	1	1	1	1	0	1	1	1
350	Ache	0	0	0	1	0	ff	8	1	1	1	0	0	0	1	1	0	0	1	0
351	Ache	0.125	1	1	1	1	mm	17	1	1	1	0	0	0	1	1	0	1	0	1	1
